# Supplementary material
Source: publisher site journal article supplement (https://www.dovepress.com/article/600596)
Supplement: Supplementary file 1 [file 600596%20Supplementary%20Material.pdf]

## Supplementary Methods

### ***Selection of genetic instrumental variables***

Mendelian randomization (MR) analysis is based on the following three assumptions: (1) the genetic instrumental variables (IVs) must be related to the exposure, (2) IVs should not be related to the outcome through confounders, (3) the IVs affect the outcome only dependently through the exposure.<sup>1</sup> The cis-QTL (pQTL and eQTL) are defined as single-nucleotide polymorphisms (SNPs) that are strongly associated ( $P < 5 \times 10^{-8}$ ) and located within 1 megabase upstream or downstream of the corresponding gene locus. For other phenotypes, we selected SNPs with genome-wide strong association ( $P < 5 \times 10^{-8}$ ). Subsequently, these IVs were clumped using a pairwise linkage disequilibrium (LD) threshold of  $r^2 < 0.001$  and a window size of 10,000 kilobases.<sup>2</sup> The F-statistic was calculated to assess the strength of IVs, and weak IVs with an F-statistic lower than 10 were excluded.<sup>3</sup> Additionally, SNPs with low minor allele frequency (MAF  $< 0.01$ ) and those containing palindromic alleles were excluded.

### ***Mendelian randomization***

For two-sample MR, the inverse variance weighted (IVW) method under multiplicative random effects were used for more than one independent variable, and the Wald ratio method was applied for a single independent variable to estimate the causal effect between exposure and outcome.<sup>4</sup> Using two-sample MR findings, we applied two-step MR to explore how BP traits mediate the causal link between plasma proteins and AD.<sup>5</sup> Specifically, the effect size of the mediation effect was defined as the product of the effect of exposure on mediator and the effect of mediator on outcome ( $\beta_1 \times \beta_2$ ). The mediation proportion was defined as the ratio of the mediation effect to the total effect of exposure on outcome ( $\beta_1 \times \beta_2 / \beta_{\text{total}}$ ). The delta method was used to estimate the standard error (SE) and 95% confidence interval (95% CI).<sup>6</sup> A positive mediation pathway was defined as a consistent direction of significant total effect and mediation effect.

### ***Functional enrichment analysis***

The 'clusterProfiler' package was used to perform Gene Ontology (GO) and Kyoto Encyclopedia of Genes and Genomes (KEGG) enrichment analyses on proteins associated with BP traits and AD.<sup>7</sup> Due to the small number of proteins and their strong mutual independence, we considered enrichment terms with  $P < 0.05$  as significant.

### ***Genetic colocalization analysis***

To investigate whether there are shared causal variants underlying the genetic associations across plasma proteins, BP traits, and AD, we performed Bayesian colocalization analysis using the 'coloc' package within the cis-regions of plasma proteins.<sup>8</sup> The colocalization analysis included five hypotheses, H0: no genetic association for either trait in the region, H1 and 2: genetic association for only one trait, H3: genetic associations for both traits with different causal variants, and H4: genetic associations for both traits with a same causal variant. Colocalization of the two traits in the region is considered when the posterior probability (PP) of H4 exceeds 70%. Additionally, we conducted multi-trait colocalization using

the 'moloc' package.<sup>9</sup> Colocalization of multiple traits in the region is considered when the PP exceeds 70%, and a PP greater than 50% is regarded as suggestive evidence of colocalization.<sup>10</sup>

## ***Sensitivity analyses***

For the positive mediation pathway, sensitivity analyses were performed. The robustness of the primary MR analysis was verified using the MR Egger and weighted median methods for re-evaluation.<sup>11,12</sup> Heterogeneity was detected using the Cochran's Q test, and horizontal pleiotropy was detected using the MR Egger intercept and the Mendelian Randomization pleiotropy residual sum and outlier (MR-PRESSO) test.<sup>11,13,14</sup>

## ***Plasma proteome sequencing***

The collected blood samples were sent to Shanghai Personal Biotechnology Co., Ltd. for plasma proteome sequencing. The detailed sequencing methodology is described as follows. The nanomagnetic beads were pretreated in accordance with the protocol of the low-abundance protein enrichment kit, followed by incubating an appropriate amount of nanomagnetic beads with an appropriate volume of blood samples under shaking at room temperature. The magnetic beads were separated from the samples using a magnetic rack, and then washed three times with eluent. At this point, the low-abundance proteins were enriched on the magnetic beads, and protein denaturation, reduction, alkylation, and enzymatic hydrolysis could be directly performed on the nanomagnetic beads. The detailed procedure is as follows. Add 20  $\mu$ L of Digestion Solution 1 to the centrifuge tube containing magnetic beads, and incubate at 55°C and 1700 rpm for 0.5 hours. After incubation, allow the samples to return to room temperature, then add 20  $\mu$ L of Digestion Solution 2, and incubate at 37°C for 2 hours in the dark with shaking at 1700 rpm. Subsequently, add 20  $\mu$ L of termination solution, pipette up and down to mix well, place the tube on a magnetic rack and let it stand for 3 minutes. After the enrichment reagent is completely adsorbed by the magnet, transfer the supernatant to a new centrifuge tube.

Peptide samples were desalted using C18 desalting tips. The desalting column was activated with 100% acetonitrile and equilibrated with 0.1% formic acid. The enzymatically digested peptides were loaded onto the column, followed by washing the column with 0.1% formic acid solution. The waste solution was discarded, and the washing step was repeated twice. Finally, the eluent (70% acetonitrile, 0.1% formic acid) was added for elution, and the eluate was collected. The samples were dried using a vacuum centrifugal concentrator.

Each sample was separated using a nano-flow Vanquish Neo UHPLC system. A Thermo Scientific™ EASY-Spray™ column (2  $\mu$ m C18, 150  $\mu$ m  $\times$  15 cm, part number: ES906) was employed, with the column temperature maintained at 55°C and the autosampler temperature set at 5°C.

For data-independent acquisition (DIA) analysis, chromatographic separation was performed using a nano-flow Vanquish Neo system (Thermo Scientific). After nano-high-performance liquid chromatography separation, the samples were subjected to DIA mass spectrometry analysis using an Astral high-resolution mass spectrometer (Thermo Scientific). The detection mode was set to DIA. The precursor ion scanning range was 380-980 m/z, the MS1 resolution was 240,000 (at 200 m/z), the Normalized AGC Target was set at 500%, and the Maximum IT

was 5 ms. For MS2, the DIA data acquisition mode was adopted, with 299 scanning windows configured. The Isolation Window was 2 m/z, the HCD Collision Energy was 25 eV, the Normalized AGC Target was 500%, and the Maximum IT was 3 ms.

Selecting an appropriate protein sequence database is a fundamental and critical step for the qualitative proteomic analysis of mass spectrometry data. The database used in this project was GCF\_000001405.40\_id9606\_136282s\_2025\_05\_21.fasta. Data analysis was performed using DIA-NN 1.9.2. The main software parameters were set as follows: the enzyme was trypsin, the maximum number of missed cleavages was 1, the fixed modification was carbamidomethylation (C), and the variable modifications were oxidation (M) and acetylation (protein N-terminus). All reported data were based on a 99% protein identification confidence level with a false discovery rate (FDR)  $\leq$  1%.

### ***Single-cell RNA sequencing analyses***

GSE213740 is a scRNA-seq dataset containing 9 cases of human ascending aortic tissues, including 6 dissected, 3 normal aortic tissues.<sup>15</sup> The Seurat package was used to load and process the scRNA-seq data.<sup>16</sup> Firstly, low-quality cells were eliminated for quality control, including those with mitochondrial genes > 10%, erythrocyte genes > 5%, nCount > 40,000 and nFeature > 7,000. Secondly, the standard process of scRNA-seq data was carried out, including normalization, highly variable features identification, scaling and centering, principal component analysis dimensional reduction, integration, adjusting batch effects by Harmony algorithm,<sup>17</sup> shared nearest-neighbor graph construction, cell cluster determination, and uniform manifold approximation and projection (UMAP) dimensional reduction and visualization.

Based on the specific cell markers in aortic tissues described in previous literature,<sup>18,19</sup> including MYH11 (smooth muscle cell, SMC), DCN (fibroblast, FIB), PECAM1 (endothelial cell, EC), MPZ (Schwann cell), PTPRC (immune cell), LYZ (macrophage), CD3D (T cell), CD79A (B cell), and MKI67 (proliferating cell).

The FindAllMarkers function was used to calculate the differentially expressed genes (DEGs) in each cell type. The top 5 DEGs of each cell type with the screening criteria of absolute log<sub>2</sub>FC of the average expression > 1 and adjusted p-value < 0.05 were shown.

The CellChatDB database integrates signaling molecule interactions from the Kyoto Encyclopedia of Genes and Genomes (KEGG) database, as well as experimentally validated ligand-receptor pairs from literature. The CellChat package can be employed to infer, analyze, and visualize cell-cell communication from scRNA-seq based on the CellChatDB database.<sup>20</sup> The ligand-receptor pair analysis in CellChat primarily quantifies the probability of signal communication between distinct cell types. By using this, we computed cell-cell communication in aortic tissues, focusing on the role of the encoding genes of candidate proteins in cell-cell crosstalk.

### ***Drug Target Analysis***

We used the Therapeutic Target Database (TTD), Drug-Gene Interaction Database (DGIdb), DrugBank, and Open Targets Platform to evaluate the druggability of each candidate proteins. We screened out drug molecules that may be potentially used for the treatment of AD.<sup>21-24</sup>

### ***Phenome-wide association study analysis***

The AstraZeneca PheWAS Portal is a public repository of gene-phenotype associations generated using sequencing and phenotypic data obtained from the UKB.<sup>25</sup> We conducted an online PheWAS analysis on it to assess the associations between various traits and candidate proteins, determining whether candidate proteins have potential detrimental effects on other phenotypes.

## References

1. Greenland S. An introduction to instrumental variables for epidemiologists. *Int J Epidemiol.* Aug 2000;29(4):722-9. doi:10.1093/ije/29.4.722
2. Hemani G, Tilling K, Davey Smith G. Orienting the causal relationship between imprecisely measured traits using GWAS summary data. *PLoS Genet.* Nov 2017;13(11):e1007081. doi:10.1371/journal.pgen.1007081
3. Pierce BL, Ahsan H, Vanderweele TJ. Power and instrument strength requirements for Mendelian randomization studies using multiple genetic variants. *Int J Epidemiol.* Jun 2011;40(3):740-52. doi:10.1093/ije/dyq151
4. Burgess S, Butterworth A, Thompson SG. Mendelian randomization analysis with multiple genetic variants using summarized data. *Genet Epidemiol.* Nov 2013;37(7):658-65. doi:10.1002/gepi.21758
5. Sanderson E. Multivariable Mendelian Randomization and Mediation. *Cold Spring Harb Perspect Med.* Feb 1 2021;11(2)doi:10.1101/cshperspect.a038984
6. Burgess S, Daniel RM, Butterworth AS, Thompson SG. Network Mendelian randomization: using genetic variants as instrumental variables to investigate mediation in causal pathways. *Int J Epidemiol.* Apr 2015;44(2):484-95. doi:10.1093/ije/dyu176
7. Xu S, Hu E, Cai Y, et al. Using clusterProfiler to characterize multiomics data. *Nat Protoc.* Nov 2024;19(11):3292-3320. doi:10.1038/s41596-024-01020-z
8. Giambartolomei C, Vukcevic D, Schadt EE, et al. Bayesian test for colocalisation between pairs of genetic association studies using summary statistics. *PLoS Genet.* May 2014;10(5):e1004383. doi:10.1371/journal.pgen.1004383
9. Giambartolomei C, Zhenli Liu J, Zhang W, et al. A Bayesian framework for multiple trait colocalization from summary association statistics. *Bioinformatics.* Aug 1 2018;34(15):2538-2545. doi:10.1093/bioinformatics/bty147
10. Meena D, Huang J, Smith A, et al. Blood pressure, plasma proteins, and cardiovascular diseases: a network Mendelian randomization and observational study. *Eur Heart J.* Oct 9 2025;doi:10.1093/eurheartj/ehaf725
11. Bowden J, Davey Smith G, Burgess S. Mendelian randomization with invalid instruments: effect estimation and bias detection through Egger regression. *Int J Epidemiol.* Apr 2015;44(2):512-25. doi:10.1093/ije/dyv080
12. Bowden J, Davey Smith G, Haycock PC, Burgess S. Consistent Estimation in Mendelian Randomization with Some Invalid Instruments Using a Weighted Median Estimator. *Genet Epidemiol.* May 2016;40(4):304-14. doi:10.1002/gepi.21965
13. Greco MF, Minelli C, Sheehan NA, Thompson JR. Detecting pleiotropy in Mendelian randomisation studies with summary data and a continuous outcome. *Stat Med.* Sep 20 2015;34(21):2926-40. doi:10.1002/sim.6522

14. Verbanck M, Chen CY, Neale B, Do R. Detection of widespread horizontal pleiotropy in causal relationships inferred from Mendelian randomization between complex traits and diseases. *Nat Genet.* May 2018;50(5):693-698. doi:10.1038/s41588-018-0099-7
15. Zhang B, Zeng K, Guan RC, et al. Single-Cell RNA-Seq Analysis Reveals Macrophages Are Involved in the Pathogenesis of Human Sporadic Acute Type A Aortic Dissection. *Biomolecules.* Feb 20 2023;13(2)doi:10.3390/biom13020399
16. Hao Y, Stuart T, Kowalski MH, et al. Dictionary learning for integrative, multimodal and scalable single-cell analysis. *Nat Biotechnol.* Feb 2024;42(2):293-304. doi:10.1038/s41587-023-01767-y
17. Korsunsky I, Millard N, Fan J, et al. Fast, sensitive and accurate integration of single-cell data with Harmony. *Nat Methods.* Dec 2019;16(12):1289-1296. doi:10.1038/s41592-019-0619-0
18. Li Y, Ren P, Dawson A, et al. Single-Cell Transcriptome Analysis Reveals Dynamic Cell Populations and Differential Gene Expression Patterns in Control and Aneurysmal Human Aortic Tissue. *Circulation.* Oct 6 2020;142(14):1374-1388. doi:10.1161/circulationaha.120.046528
19. Luo Y, Luo J, An P, et al. The activator protein-1 complex governs a vascular degenerative transcriptional programme in smooth muscle cells to trigger aortic dissection and rupture. *Eur Heart J.* Jan 27 2024;45(4):287-305. doi:10.1093/eurheartj/ehad534
20. Jin S, Plikus MV, Nie Q. CellChat for systematic analysis of cell-cell communication from single-cell transcriptomics. *Nat Protoc.* Jan 2025;20(1):180-219. doi:10.1038/s41596-024-01045-4
21. Zhou Y, Zhang Y, Zhao D, et al. TTD: Therapeutic Target Database describing target druggability information. *Nucleic Acids Res.* Jan 5 2024;52(D1):D1465-d1477. doi:10.1093/nar/gkad751
22. Cannon M, Stevenson J, Stahl K, et al. DGIdb 5.0: rebuilding the drug-gene interaction database for precision medicine and drug discovery platforms. *Nucleic Acids Res.* Jan 5 2024;52(D1):D1227-d1235. doi:10.1093/nar/gkad1040
23. Knox C, Wilson M, Klinger CM, et al. DrugBank 6.0: the DrugBank Knowledgebase for 2024. *Nucleic Acids Res.* Jan 5 2024;52(D1):D1265-d1275. doi:10.1093/nar/gkad976
24. Buniello A, Suveges D, Cruz-Castillo C, et al. Open Targets Platform: facilitating therapeutic hypotheses building in drug discovery. *Nucleic Acids Res.* Jan 6 2025;53(D1):D1467-d1475. doi:10.1093/nar/gkae1128
25. Dhindsa RS, Burren OS, Sun BB, et al. Rare variant associations with plasma protein levels in the UK Biobank. *Nature.* Oct 2023;622(7982):339-347. doi:10.1038/s41586-023-06547-x

## Supplementary Tables

**Table S1.** Causal association and sensitivity analyses between blood pressure traits (UKB) and aortic dissection.

**Table S2.** Causal association between plasma proteins and essential hypertension (UKB).

**Table S3.** Causal association between plasma proteins and diastolic blood pressure (UKB).

**Table S4.** Causal association between plasma proteins and aortic dissection.

**Table S5.** Functional enrichment analysis of causal proteins associated with essential hypertension (UKB).

**Table S6.** Functional enrichment analysis of causal proteins associated with diastolic blood pressure (UKB).

**Table S7.** Functional enrichment analysis of causal proteins associated with aortic dissection.

**Table S8.** Bayesian colocalization analysis for candidate proteins to blood pressure traits (UKB) and aortic dissection.

**Table S9.** Multi-trait colocalization analysis of candidate proteins, essential hypertension (UKB), and aortic dissection.

**Table S10.** Multi-trait colocalization analysis of candidate proteins, diastolic blood pressure (UKB), and aortic dissection.

**Table S11.** Sensitivity analyses between candidate proteins, blood pressure traits (UKB), and aortic dissection.

**Table S12.** Mediation effect of blood pressure traits (UKB) on protein-associated aortic dissection.

**Table S13.** Causal association between blood pressure traits (MVP) and aortic dissection.

**Table S14.** Causal association between plasma proteins and essential hypertension (MVP).

**Table S15.** Causal association between plasma proteins and diastolic blood pressure (MVP).

**Table S16.** Functional enrichment analysis of causal proteins associated with essential hypertension (MVP).

**Table S17.** Functional enrichment analysis of causal proteins associated with diastolic blood pressure (MVP).

**Table S18.** Bayesian colocalization analysis for candidate proteins to blood pressure traits (MVP).

**Table S19.** Mediation effect of blood pressure traits (MVP) on protein-associated aortic dissection.

**Table S20.** Causal association between tissue-specific gene expression and aortic dissection.

**Table S21.** Potential drugs for candidate proteins in Therapeutic Target Database (TTD).

**Table S22.** Potential drugs for candidate proteins in Drug-Gene Interaction Database (DGIdb).

**Table S23.** Potential drugs for candidate proteins in DrugBank.

**Table S24.** Potential drugs for candidate proteins in Open Targets Platform.

**Table S1.** Causal association and sensitivity analyses between blood pressure traits (UKB) and aortic dissection.

| Exposure | Outcome | Method                           | nSNP | OR (95% CI)        | P value  | Adjusted P | Cochran's Q<br>pval | MR Egger intercept<br>pval | MR-PRESSO Global<br>pval |
|----------|---------|----------------------------------|------|--------------------|----------|------------|---------------------|----------------------------|--------------------------|
| HTN      | AD      | Inverse variance weighted        | 201  | 1.52 (1.27, 1.81)  | 4.19E-06 | 2.10E-05   | 1.66E-03            |                            |                          |
| HTN      | AD      | MR Egger                         | 201  | 1.78 (1.07, 2.95)  | 2.72E-02 | 4.53E-02   | 1.54E-03            | 5.12E-01                   |                          |
| HTN      | AD      | Weighted median                  | 201  | 1.47 (1.16, 1.88)  | 1.73E-03 | 3.71E-03   |                     |                            |                          |
| HTN      | AD      | MR-PRESSO (Raw)                  | 201  | 1.52 (1.27, 1.81)  | 7.44e-06 | 2.14e-05   |                     |                            | 0.002                    |
| HTN      | AD      | MR-PRESSO<br>(Outlier-corrected) | 197  | 1.59 (1.35, 1.87)  | 5.63E-08 | 8.45E-07   |                     |                            |                          |
| SBP      | AD      | Inverse variance weighted        | 201  | 1.15 (0.76, 1.74)  | 5.09E-01 | 5.10E-01   | 2.96E-04            |                            |                          |
| SBP      | AD      | MR Egger                         | 201  | 1.85 (0.54, 6.31)  | 3.26E-01 | 3.93E-01   | 2.84E-04            | 4.19E-01                   |                          |
| SBP      | AD      | Weighted median                  | 201  | 1.54 (0.89, 2.65)  | 1.22E-01 | 1.67E-01   |                     |                            |                          |
| SBP      | AD      | MR-PRESSO (Raw)                  | 201  | 1.15 (0.76, 1.74)  | 5.10E-01 | 5.10E-01   |                     |                            | 0.002                    |
| SBP      | AD      | MR-PRESSO<br>(Outlier-corrected) | 195  | 1.22 (0.81, 1.82)  | 3.41E-01 | 3.93E-01   |                     |                            |                          |
| DBP      | AD      | Inverse variance weighted        | 187  | 2.97 (1.88, 4.69)  | 2.94E-06 | 2.10e-05   | 7.80E-07            |                            |                          |
| DBP      | AD      | MR Egger                         | 187  | 4.07 (0.90, 18.38) | 6.92E-02 | 1.04E-01   | 6.49E-07            | 6.67E-01                   |                          |
| DBP      | AD      | Weighted median                  | 187  | 2.20 (1.24, 3.91)  | 7.38E-03 | 1.38E-02   |                     |                            |                          |
| DBP      | AD      | MR-PRESSO (Raw)                  | 187  | 2.97 (1.88, 4.69)  | 5.64e-06 | 2.12e-05   |                     |                            | <0.001                   |
| DBP      | AD      | MR-PRESSO<br>(Outlier-corrected) | 181  | 2.49 (1.69, 3.68)  | 8.55e-06 | 2.14e-05   |                     |                            |                          |

**Table S2.** Causal association between plasma proteins and essential hypertension (UKB).

| Exposure | Outcome | Beta (95% CI)        | P value  | Adjusted P | Exposure | Outcome | Beta (95% CI)        | P value  | Adjusted P |
|----------|---------|----------------------|----------|------------|----------|---------|----------------------|----------|------------|
| ABLIM3   | HTN     | -0.13 (-0.22, -0.05) | 2.09E-03 | 3.29E-02   | LAYN     | HTN     | -0.42 (-0.59, -0.24) | 2.80E-06 | 1.63E-04   |
| ACADVL   | HTN     | -0.51 (-0.7, -0.32)  | 1.07E-07 | 9.98E-06   | LEAP2    | HTN     | -0.06 (-0.09, -0.02) | 8.11E-04 | 1.70E-02   |
| ACVRL1   | HTN     | -0.08 (-0.13, -0.03) | 3.35E-03 | 4.47E-02   | LIMA1    | HTN     | -0.56 (-0.72, -0.41) | 4.44E-13 | 9.60E-11   |
| ADH5     | HTN     | 0.09 (0.03, 0.15)    | 1.61E-03 | 2.80E-02   | LYPLAL1  | HTN     | 0.14 (0.05, 0.24)    | 3.37E-03 | 4.47E-02   |
| ADK      | HTN     | -0.3 (-0.48, -0.12)  | 1.27E-03 | 2.32E-02   | MANBA    | HTN     | -0.08 (-0.11, -0.05) | 2.08E-07 | 1.57E-05   |
| AGT      | HTN     | 0.17 (0.12, 0.22)    | 5.56E-11 | 1.05E-08   | MAP3K3   | HTN     | 0.3 (0.11, 0.49)     | 2.29E-03 | 3.46E-02   |
| AIF1     | HTN     | -0.14 (-0.21, -0.06) | 2.08E-04 | 5.63E-03   | MCEE     | HTN     | -0.24 (-0.38, -0.1)  | 1.03E-03 | 2.05E-02   |
| ALDH2    | HTN     | 0.58 (0.43, 0.72)    | 3.75E-15 | 1.42E-12   | MCEMP1   | HTN     | -0.27 (-0.45, -0.1)  | 1.87E-03 | 3.11E-02   |
| ALOX15B  | HTN     | -0.21 (-0.34, -0.08) | 1.27E-03 | 2.32E-02   | MET      | HTN     | 0.14 (0.07, 0.21)    | 6.13E-05 | 1.97E-03   |
| ANTXR1   | HTN     | 0.6 (0.41, 0.79)     | 9.79E-10 | 1.65E-07   | MGAT1    | HTN     | -0.29 (-0.45, -0.12) | 5.46E-04 | 1.31E-02   |
| APOC3    | HTN     | -0.12 (-0.18, -0.05) | 2.43E-04 | 6.46E-03   | NADK     | HTN     | -0.18 (-0.26, -0.11) | 1.03E-06 | 6.48E-05   |
| ARHGEF25 | HTN     | 0.18 (0.1, 0.25)     | 8.63E-06 | 4.08E-04   | NCAN     | HTN     | -0.09 (-0.14, -0.04) | 7.95E-04 | 1.69E-02   |
| ARL3     | HTN     | 0.16 (0.1, 0.22)     | 2.02E-07 | 1.57E-05   | NCF1     | HTN     | 0.06 (0.03, 0.08)    | 3.07E-05 | 1.08E-03   |
| ASPN     | HTN     | 0.05 (0.02, 0.08)    | 2.59E-03 | 3.66E-02   | NMT1     | HTN     | 0.75 (0.56, 0.95)    | 7.59E-14 | 1.91E-11   |
| BRD2     | HTN     | 0.41 (0.22, 0.6)     | 1.60E-05 | 6.21E-04   | NPPB     | HTN     | -0.49 (-0.59, -0.39) | 1.03E-21 | 1.56E-18   |
| C3       | HTN     | 0.19 (0.09, 0.3)     | 3.40E-04 | 8.87E-03   | NPTX1    | HTN     | -0.07 (-0.1, -0.04)  | 4.39E-06 | 2.46E-04   |
| C3       | HTN     | -0.17 (-0.27, -0.06) | 2.03E-03 | 3.29E-02   | NQO1     | HTN     | -0.08 (-0.13, -0.04) | 3.46E-04 | 8.88E-03   |
| CALB2    | HTN     | 0.4 (0.22, 0.58)     | 1.97E-05 | 7.27E-04   | NTRK3    | HTN     | -0.07 (-0.11, -0.03) | 6.39E-04 | 1.44E-02   |
| CCM2     | HTN     | 0.23 (0.08, 0.38)    | 2.72E-03 | 3.81E-02   | PCSK1N   | HTN     | 0.09 (0.03, 0.15)    | 2.19E-03 | 3.41E-02   |
| CD46     | HTN     | -0.06 (-0.1, -0.02)  | 3.09E-03 | 4.17E-02   | PDGFRA   | HTN     | -0.15 (-0.24, -0.06) | 1.27E-03 | 2.32E-02   |
| CD86     | HTN     | 0.27 (0.1, 0.43)     | 1.36E-03 | 2.43E-02   | PDXK     | HTN     | -0.22 (-0.29, -0.14) | 1.02E-08 | 1.40E-06   |
| CHRD1    | HTN     | 0.11 (0.06, 0.15)    | 9.23E-07 | 6.07E-05   | PGLYRP2  | HTN     | 0.05 (0.02, 0.08)    | 3.84E-03 | 4.97E-02   |
| CHST12   | HTN     | -0.08 (-0.13, -0.03) | 3.77E-03 | 4.92E-02   | PGP      | HTN     | 0.07 (0.03, 0.12)    | 2.83E-03 | 3.89E-02   |
| CLMP     | HTN     | 0.07 (0.03, 0.11)    | 5.81E-04 | 1.35E-02   | PIANP    | HTN     | 0.09 (0.04, 0.14)    | 1.12E-03 | 2.17E-02   |

|        |     |                      |          |          |          |     |                      |          |          |
|--------|-----|----------------------|----------|----------|----------|-----|----------------------|----------|----------|
| COMT   | HTN | -0.32 (-0.43, -0.21) | 8.89E-09 | 1.35E-06 | PIANP    | HTN | 0.08 (0.03, 0.13)    | 1.12E-03 | 2.17E-02 |
| CRAT   | HTN | 0.17 (0.06, 0.28)    | 2.31E-03 | 3.46E-02 | POGLUT1  | HTN | -0.07 (-0.12, -0.03) | 1.14E-03 | 2.17E-02 |
| CRLF1  | HTN | -0.09 (-0.13, -0.05) | 2.15E-05 | 7.75E-04 | POR      | HTN | 0.09 (0.03, 0.14)    | 3.03E-03 | 4.14E-02 |
| CSK    | HTN | 0.71 (0.56, 0.86)    | 1.19E-20 | 8.98E-18 | PPIC     | HTN | 0.06 (0.02, 0.09)    | 7.31E-04 | 1.60E-02 |
| DBNL   | HTN | 0.2 (0.07, 0.34)     | 2.82E-03 | 3.89E-02 | PRKCB    | HTN | 0.2 (0.07, 0.32)     | 1.98E-03 | 3.25E-02 |
| DCTPP1 | HTN | -0.38 (-0.55, -0.2)  | 3.99E-05 | 1.31E-03 | PRSS8    | HTN | 0.26 (0.09, 0.43)    | 2.08E-03 | 3.29E-02 |
| ENDOU  | HTN | 0.23 (0.08, 0.38)    | 2.08E-03 | 3.29E-02 | PSMD9    | HTN | -0.12 (-0.2, -0.04)  | 2.39E-03 | 3.51E-02 |
| ENPEP  | HTN | -0.12 (-0.15, -0.09) | 7.37E-14 | 1.91E-11 | PTK7     | HTN | 0.24 (0.13, 0.34)    | 1.60E-05 | 6.21E-04 |
| ENTPD6 | HTN | 0.13 (0.06, 0.21)    | 3.89E-04 | 9.82E-03 | RAB1A    | HTN | 0.44 (0.28, 0.61)    | 1.12E-07 | 9.98E-06 |
| EPB41  | HTN | -0.28 (-0.41, -0.16) | 1.36E-05 | 6.07E-04 | RAB31    | HTN | 0.12 (0.04, 0.2)     | 3.73E-03 | 4.91E-02 |
| EPHB2  | HTN | 0.05 (0.02, 0.09)    | 2.49E-03 | 3.56E-02 | RARRES1  | HTN | 0.04 (0.02, 0.06)    | 6.22E-04 | 1.43E-02 |
| FABP2  | HTN | -0.07 (-0.11, -0.04) | 1.41E-05 | 6.11E-04 | RBP7     | HTN | -0.14 (-0.23, -0.06) | 9.77E-04 | 2.00E-02 |
| FN1    | HTN | 0.15 (0.08, 0.21)    | 7.75E-06 | 3.85E-04 | RELT     | HTN | -0.31 (-0.49, -0.13) | 7.25E-04 | 1.60E-02 |
| FN1    | HTN | 0.15 (0.08, 0.21)    | 7.75E-06 | 3.85E-04 | RIGI     | HTN | 0.21 (0.1, 0.33)     | 1.99E-04 | 5.47E-03 |
| FN1    | HTN | -0.13 (-0.19, -0.07) | 7.88E-06 | 3.85E-04 | RNASE4   | HTN | 0.05 (0.02, 0.08)    | 2.33E-03 | 3.46E-02 |
| FUT5   | HTN | 0.03 (0.01, 0.05)    | 1.45E-03 | 2.56E-02 | ROBO1    | HTN | 0.16 (0.06, 0.25)    | 9.90E-04 | 2.00E-02 |
| GFER   | HTN | -0.34 (-0.51, -0.18) | 6.68E-05 | 2.11E-03 | SAT2     | HTN | 0.12 (0.08, 0.17)    | 4.07E-08 | 5.13E-06 |
| GHR    | HTN | 0.09 (0.05, 0.14)    | 8.55E-05 | 2.59E-03 | SDF2     | HTN | -0.06 (-0.1, -0.02)  | 1.74E-03 | 2.99E-02 |
| GPT    | HTN | 0.28 (0.1, 0.46)     | 2.21E-03 | 3.41E-02 | SEMA7A   | HTN | -0.18 (-0.29, -0.07) | 1.30E-03 | 2.34E-02 |
| GUK1   | HTN | -0.13 (-0.2, -0.07)  | 8.52E-05 | 2.59E-03 | SHBG     | HTN | 0.1 (0.04, 0.15)     | 4.86E-04 | 1.19E-02 |
| HEXIM1 | HTN | 0.3 (0.19, 0.41)     | 9.08E-08 | 9.82E-06 | SYT11    | HTN | -0.33 (-0.47, -0.18) | 5.84E-06 | 3.15E-04 |
| HEXIM2 | HTN | 0.29 (0.18, 0.4)     | 1.63E-07 | 1.37E-05 | TCEA2    | HTN | -0.17 (-0.23, -0.1)  | 6.12E-07 | 4.21E-05 |
| HGF    | HTN | 0.14 (0.06, 0.22)    | 8.20E-04 | 1.70E-02 | TEK      | HTN | 0.09 (0.03, 0.15)    | 2.33E-03 | 3.46E-02 |
| HGFAC  | HTN | -0.03 (-0.04, -0.01) | 1.69E-04 | 4.82E-03 | TIE1     | HTN | -0.13 (-0.18, -0.08) | 6.86E-08 | 7.99E-06 |
| HS6ST1 | HTN | -0.12 (-0.18, -0.07) | 1.70E-05 | 6.43E-04 | TMEM106B | HTN | -0.2 (-0.28, -0.12)  | 1.57E-06 | 9.48E-05 |
| ICAM4  | HTN | 0.17 (0.08, 0.25)    | 1.81E-04 | 5.08E-03 | TNFRSF17 | HTN | -0.11 (-0.18, -0.04) | 1.76E-03 | 3.00E-02 |

|         |     |                      |          |          |         |     |                      |          |          |
|---------|-----|----------------------|----------|----------|---------|-----|----------------------|----------|----------|
| IL11RA  | HTN | -0.05 (-0.09, -0.02) | 2.44E-03 | 3.52E-02 | TNFSF12 | HTN | 0.1 (0.06, 0.14)     | 3.23E-07 | 2.33E-05 |
| IL13RA1 | HTN | 0.05 (0.02, 0.08)    | 7.94E-04 | 1.69E-02 | TNFSF14 | HTN | -0.25 (-0.41, -0.09) | 1.87E-03 | 3.11E-02 |
| ITIH1   | HTN | -0.06 (-0.09, -0.03) | 3.38E-05 | 1.14E-03 | TTL     | HTN | 0.38 (0.21, 0.55)    | 1.60E-05 | 6.21E-04 |
| ITIH4   | HTN | 0.17 (0.07, 0.27)    | 5.82E-04 | 1.35E-02 | TYRO3   | HTN | -0.15 (-0.24, -0.06) | 1.19E-03 | 2.26E-02 |
| ITPKA   | HTN | 0.28 (0.15, 0.41)    | 3.38E-05 | 1.14E-03 | UBE2C   | HTN | 0.13 (0.06, 0.2)     | 1.52E-04 | 4.42E-03 |
| KIR2DL3 | HTN | 0.02 (0.01, 0.03)    | 3.87E-03 | 4.97E-02 | ULK3    | HTN | 0.52 (0.41, 0.64)    | 7.86E-19 | 3.96E-16 |
| KIT     | HTN | 0.3 (0.11, 0.5)      | 2.42E-03 | 3.52E-02 | VTN     | HTN | -0.03 (-0.05, -0.01) | 4.25E-04 | 1.05E-02 |
| KLC1    | HTN | 0.24 (0.13, 0.35)    | 1.32E-05 | 6.03E-04 | WARS1   | HTN | 0.08 (0.04, 0.12)    | 1.27E-04 | 3.77E-03 |
| KYAT3   | HTN | -0.09 (-0.12, -0.06) | 1.01E-07 | 9.98E-06 | WBP2    | HTN | 0.41 (0.22, 0.59)    | 1.46E-05 | 6.14E-04 |

**Table S3.** Causal association between plasma proteins and diastolic blood pressure (UKB).

| Exposure | Outcome | Beta (95% CI)        | P value  | Adjusted P | Exposure | Outcome | Beta (95% CI)        | P value  | Adjusted P |
|----------|---------|----------------------|----------|------------|----------|---------|----------------------|----------|------------|
| ACADVL   | DBP     | -0.26 (-0.34, -0.17) | 1.11E-08 | 1.20E-06   | ITPKA    | DBP     | 0.15 (0.09, 0.21)    | 2.16E-06 | 1.30E-04   |
| ADH1C    | DBP     | -0.07 (-0.11, -0.04) | 1.52E-05 | 7.19E-04   | KIT      | DBP     | 0.16 (0.07, 0.25)    | 6.24E-04 | 1.52E-02   |
| AGT      | DBP     | 0.09 (0.06, 0.11)    | 5.31E-13 | 8.93E-11   | KLC1     | DBP     | 0.13 (0.08, 0.18)    | 3.17E-07 | 2.30E-05   |
| AIF1     | DBP     | -0.07 (-0.1, -0.03)  | 6.42E-05 | 2.70E-03   | LEAP2    | DBP     | -0.02 (-0.04, -0.01) | 1.95E-03 | 3.60E-02   |
| AK1      | DBP     | -0.13 (-0.22, -0.05) | 1.10E-03 | 2.39E-02   | LGALS4   | DBP     | 0.22 (0.15, 0.3)     | 1.63E-08 | 1.54E-06   |
| ALDH2    | DBP     | 0.28 (0.22, 0.35)    | 6.45E-17 | 1.39E-14   | LIMA1    | DBP     | -0.34 (-0.41, -0.27) | 3.56E-21 | 1.35E-18   |
| ANTXR1   | DBP     | 0.17 (0.09, 0.26)    | 1.26E-04 | 4.14E-03   | LRRTM2   | DBP     | 0.09 (0.03, 0.14)    | 1.37E-03 | 2.73E-02   |
| AOC1     | DBP     | -0.01 (-0.01, 0)     | 8.25E-04 | 1.88E-02   | MANBA    | DBP     | -0.03 (-0.04, -0.02) | 8.49E-06 | 4.28E-04   |
| APOB     | DBP     | -0.12 (-0.18, -0.06) | 1.07E-04 | 3.87E-03   | MARK3    | DBP     | 0.14 (0.05, 0.22)    | 1.44E-03 | 2.80E-02   |
| ARHGEF25 | DBP     | 0.08 (0.04, 0.12)    | 2.32E-04 | 6.49E-03   | MFGE8    | DBP     | 0.03 (0.01, 0.05)    | 8.49E-04 | 1.89E-02   |
| ARL3     | DBP     | 0.05 (0.02, 0.08)    | 2.12E-03 | 3.87E-02   | MXRA7    | DBP     | -0.03 (-0.05, -0.02) | 9.85E-05 | 3.63E-03   |
| ARL4D    | DBP     | 0.16 (0.08, 0.25)    | 7.45E-05 | 3.03E-03   | NCAN     | DBP     | -0.06 (-0.09, -0.04) | 1.18E-07 | 1.05E-05   |
| AZGP1    | DBP     | -0.04 (-0.06, -0.02) | 9.27E-06 | 4.52E-04   | NMT1     | DBP     | 0.38 (0.28, 0.47)    | 9.17E-16 | 1.73E-13   |
| BDH2     | DBP     | -0.05 (-0.07, -0.03) | 7.78E-07 | 4.90E-05   | NPPB     | DBP     | -0.21 (-0.25, -0.16) | 2.25E-18 | 6.79E-16   |
| BRD2     | DBP     | 0.22 (0.14, 0.31)    | 4.27E-07 | 2.94E-05   | NPPB     | DBP     | -0.06 (-0.1, -0.02)  | 1.26E-03 | 2.61E-02   |
| CCN3     | DBP     | -0.31 (-0.38, -0.25) | 7.89E-22 | 3.98E-19   | NT5C3A   | DBP     | 0.09 (0.03, 0.14)    | 1.66E-03 | 3.15E-02   |
| CD300A   | DBP     | -0.02 (-0.02, -0.01) | 8.06E-04 | 1.88E-02   | NUDT2    | DBP     | -0.04 (-0.06, -0.02) | 4.30E-04 | 1.14E-02   |
| CDH17    | DBP     | -0.02 (-0.04, -0.01) | 2.29E-03 | 4.08E-02   | PARP1    | DBP     | 0.14 (0.05, 0.24)    | 1.88E-03 | 3.51E-02   |
| CFHR3    | DBP     | -0.08 (-0.12, -0.04) | 1.41E-04 | 4.45E-03   | PCNP     | DBP     | 0.08 (0.03, 0.13)    | 2.73E-03 | 4.65E-02   |
| CFHR4    | DBP     | -0.01 (-0.02, -0.01) | 3.46E-04 | 9.35E-03   | PCOLCE   | DBP     | -0.05 (-0.08, -0.03) | 7.62E-05 | 3.03E-03   |
| CNTFR    | DBP     | 0.04 (0.02, 0.06)    | 1.28E-03 | 2.61E-02   | PCSK1N   | DBP     | 0.04 (0.02, 0.07)    | 2.22E-03 | 4.01E-02   |
| CNTN5    | DBP     | 0.03 (0.01, 0.05)    | 5.32E-04 | 1.33E-02   | PDCD6IP  | DBP     | -0.08 (-0.13, -0.04) | 9.84E-05 | 3.63E-03   |
| COL6A3   | DBP     | -0.1 (-0.17, -0.04)  | 1.61E-03 | 3.08E-02   | PDE5A    | DBP     | -0.06 (-0.09, -0.04) | 3.19E-07 | 2.30E-05   |
| CPLX1    | DBP     | 0.13 (0.05, 0.2)     | 8.22E-04 | 1.88E-02   | PDE5A    | DBP     | -0.06 (-0.08, -0.04) | 3.19E-07 | 2.30E-05   |

|            |     |                      |          |          |           |     |                      |          |          |
|------------|-----|----------------------|----------|----------|-----------|-----|----------------------|----------|----------|
| CSGALNACT2 | DBP | 0.06 (0.02, 0.1)     | 2.94E-03 | 4.94E-02 | PLCG1     | DBP | -0.13 (-0.19, -0.07) | 3.69E-05 | 1.59E-03 |
| CSK        | DBP | 0.44 (0.37, 0.51)    | 1.09E-35 | 1.65E-32 | PRSS8     | DBP | 0.23 (0.15, 0.31)    | 6.22E-09 | 7.23E-07 |
| DNER       | DBP | -0.03 (-0.04, -0.01) | 2.63E-03 | 4.57E-02 | PTPN9     | DBP | 0.11 (0.04, 0.18)    | 1.40E-03 | 2.75E-02 |
| ENPEP      | DBP | -0.04 (-0.06, -0.03) | 3.78E-09 | 4.77E-07 | QSOX2     | DBP | 0.03 (0.01, 0.04)    | 3.43E-04 | 9.35E-03 |
| EPO        | DBP | 0.12 (0.06, 0.18)    | 1.23E-04 | 4.13E-03 | RELT      | DBP | -0.2 (-0.29, -0.12)  | 2.23E-06 | 1.30E-04 |
| ERAP2      | DBP | 0.02 (0.01, 0.03)    | 2.57E-03 | 4.52E-02 | SAT2      | DBP | 0.05 (0.03, 0.07)    | 2.23E-07 | 1.87E-05 |
| ERLEC1     | DBP | -0.1 (-0.16, -0.05)  | 1.95E-04 | 5.91E-03 | SCUBE3    | DBP | -0.04 (-0.06, -0.02) | 1.81E-04 | 5.59E-03 |
| F2         | DBP | 0.07 (0.03, 0.11)    | 2.21E-04 | 6.30E-03 | SHMT1     | DBP | 0.02 (0.01, 0.03)    | 4.71E-04 | 1.21E-02 |
| F2         | DBP | 0.08 (0.04, 0.12)    | 2.21E-04 | 6.30E-03 | SPATA20   | DBP | 0.03 (0.01, 0.04)    | 2.06E-04 | 6.10E-03 |
| FCMR       | DBP | 0.06 (0.03, 0.1)     | 1.37E-03 | 2.73E-02 | SULT1A3   | DBP | -0.08 (-0.11, -0.05) | 6.03E-07 | 3.97E-05 |
| FGL1       | DBP | -0.03 (-0.04, -0.01) | 4.69E-04 | 1.21E-02 | TCEA2     | DBP | -0.1 (-0.13, -0.07)  | 6.14E-10 | 8.45E-08 |
| GFER       | DBP | -0.23 (-0.31, -0.15) | 1.33E-08 | 1.34E-06 | THBS2     | DBP | -0.12 (-0.19, -0.06) | 7.81E-05 | 3.03E-03 |
| HEXIM1     | DBP | 0.1 (0.05, 0.15)     | 1.32E-04 | 4.26E-03 | TIE1      | DBP | -0.07 (-0.09, -0.05) | 8.33E-11 | 1.26E-08 |
| HEXIM2     | DBP | 0.1 (0.05, 0.15)     | 1.14E-04 | 3.93E-03 | TNFRSF11B | DBP | -0.05 (-0.07, -0.02) | 1.11E-04 | 3.91E-03 |
| HP         | DBP | -0.02 (-0.03, -0.01) | 2.92E-06 | 1.64E-04 | TNFRSF17  | DBP | -0.07 (-0.11, -0.04) | 1.87E-05 | 8.58E-04 |
| HP         | DBP | -0.02 (-0.03, -0.01) | 1.25E-03 | 2.61E-02 | TXNL4B    | DBP | 0.05 (0.02, 0.08)    | 1.16E-03 | 2.47E-02 |
| HSPA1L     | DBP | 0.06 (0.03, 0.09)    | 3.98E-06 | 2.15E-04 | TYRO3     | DBP | -0.07 (-0.11, -0.03) | 9.86E-04 | 2.16E-02 |
| HSPG2      | DBP | 0.03 (0.01, 0.05)    | 5.37E-04 | 1.33E-02 | ULK3      | DBP | 0.33 (0.27, 0.38)    | 5.66E-33 | 4.28E-30 |
| IGFLR1     | DBP | 0.02 (0.01, 0.04)    | 2.66E-03 | 4.58E-02 | VARS1     | DBP | 0.07 (0.04, 0.1)     | 4.11E-06 | 2.15E-04 |
| IL17RD     | DBP | 0.02 (0.01, 0.04)    | 8.31E-04 | 1.88E-02 | VAT1      | DBP | 0.11 (0.05, 0.18)    | 8.09E-04 | 1.88E-02 |
| IRAG1      | DBP | -0.18 (-0.22, -0.14) | 2.75E-17 | 6.93E-15 | WBP2      | DBP | 0.19 (0.1, 0.27)     | 1.97E-05 | 8.75E-04 |

**Table S4.** Causal association between plasma proteins and aortic dissection.

| Exposure | Outcome | OR (95% CI)        | P value  | Exposure | Outcome | OR (95% CI)        | P value  |
|----------|---------|--------------------|----------|----------|---------|--------------------|----------|
| ADI1     | AD      | 0.39 (0.16, 0.96)  | 4.14E-02 | LRIG3    | AD      | 1.23 (1, 1.5)      | 4.57E-02 |
| B3GLCT   | AD      | 0.64 (0.46, 0.89)  | 7.11E-03 | MANSC4   | AD      | 0.58 (0.36, 0.93)  | 2.47E-02 |
| BDNF     | AD      | 3.28 (1.46, 7.38)  | 4.06E-03 | MAPK8    | AD      | 4.93 (1.08, 22.54) | 3.95E-02 |
| C3       | AD      | 0.26 (0.07, 0.93)  | 3.84E-02 | MESD     | AD      | 12.04 (2.06, 70.5) | 5.78E-03 |
| C3       | AD      | 0.32 (0.11, 0.94)  | 3.84E-02 | MST1     | AD      | 1.17 (1.03, 1.32)  | 1.36E-02 |
| C3       | AD      | 0.26 (0.07, 0.93)  | 3.84E-02 | NCR1     | AD      | 1.57 (1.15, 2.13)  | 4.18E-03 |
| CADM1    | AD      | 0.54 (0.29, 0.99)  | 4.69E-02 | NELL1    | AD      | 1.58 (1.17, 2.14)  | 3.09E-03 |
| CCDC126  | AD      | 1.39 (1, 1.92)     | 4.74E-02 | NPL      | AD      | 1.61 (1.04, 2.51)  | 3.28E-02 |
| CCL19    | AD      | 0.08 (0.01, 0.49)  | 6.24E-03 | NPPB     | AD      | 0.73 (0.54, 1)     | 4.88E-02 |
| CCN3     | AD      | 0.22 (0.06, 0.9)   | 3.53E-02 | NQO1     | AD      | 0.73 (0.55, 0.97)  | 2.99E-02 |
| CHI3L1   | AD      | 1.19 (1.02, 1.4)   | 2.71E-02 | NUDT5    | AD      | 0.18 (0.06, 0.56)  | 3.15E-03 |
| CHKB     | AD      | 0.23 (0.06, 0.86)  | 2.83E-02 | PCOLCE2  | AD      | 0.82 (0.68, 0.99)  | 3.49E-02 |
| CNPY3    | AD      | 2.15 (1, 4.61)     | 4.90E-02 | PDCD1LG2 | AD      | 0.67 (0.48, 0.93)  | 1.51E-02 |
| CNTNAP2  | AD      | 0.75 (0.57, 0.98)  | 3.84E-02 | PLEK     | AD      | 0.3 (0.11, 0.77)   | 1.25E-02 |
| COL6A3   | AD      | 0.12 (0.04, 0.42)  | 8.00E-04 | PLOD2    | AD      | 3.01 (1.09, 8.32)  | 3.40E-02 |
| COMP     | AD      | 0.55 (0.33, 0.9)   | 1.72E-02 | POR      | AD      | 1.58 (1.02, 2.44)  | 3.90E-02 |
| CPB2     | AD      | 0.71 (0.58, 0.88)  | 1.36E-03 | PPCS     | AD      | 0.31 (0.13, 0.74)  | 8.09E-03 |
| CYB5R2   | AD      | 1.39 (1.01, 1.92)  | 4.10E-02 | PRTN3    | AD      | 1.37 (1.07, 1.76)  | 1.18E-02 |
| CYRIB    | AD      | 6.25 (1.17, 33.44) | 3.21E-02 | PTGR1    | AD      | 1.22 (1.02, 1.45)  | 2.53E-02 |
| DECR1    | AD      | 0 (0, 0.47)        | 3.13E-02 | REG4     | AD      | 3.18 (1.56, 6.48)  | 1.42E-03 |
| DUSP13B  | AD      | 0.38 (0.18, 0.79)  | 1.01E-02 | RIGI     | AD      | 3.58 (1.32, 9.7)   | 1.21E-02 |
| FAH      | AD      | 1.43 (1.02, 1.99)  | 3.58E-02 | RPE      | AD      | 5.03 (1.71, 14.77) | 3.28E-03 |
| FCER2    | AD      | 1.39 (1.01, 1.92)  | 4.64E-02 | SCO2     | AD      | 2.53 (1.06, 6.06)  | 3.64E-02 |
| FCRL6    | AD      | 2.82 (1.29, 6.15)  | 9.40E-03 | SEMA6A   | AD      | 0.15 (0.05, 0.45)  | 8.05E-04 |

|         |    |                    |          |         |    |                    |          |
|---------|----|--------------------|----------|---------|----|--------------------|----------|
| GHR     | AD | 1.83 (1.2, 2.81)   | 5.27E-03 | SHMT1   | AD | 0.81 (0.67, 0.98)  | 3.33E-02 |
| GLIPR2  | AD | 1.41 (1.01, 1.97)  | 4.43E-02 | SIRPG   | AD | 0.46 (0.26, 0.84)  | 1.06E-02 |
| GPC5    | AD | 0.78 (0.63, 0.98)  | 3.18E-02 | SLITRK1 | AD | 4.67 (1.04, 20.88) | 4.38E-02 |
| HTN3    | AD | 0.43 (0.23, 0.82)  | 9.92E-03 | SNPH    | AD | 5.2 (1.13, 23.85)  | 3.38E-02 |
| IBSP    | AD | 2.39 (1, 5.71)     | 4.94E-02 | SPOCK2  | AD | 0.53 (0.35, 0.82)  | 4.45E-03 |
| IDS     | AD | 3.06 (1.01, 9.26)  | 4.80E-02 | TFRC    | AD | 3.31 (1.01, 10.87) | 4.85E-02 |
| IL13RA1 | AD | 1.58 (1.26, 1.97)  | 6.18E-05 | THSD1   | AD | 1.59 (1.06, 2.4)   | 2.53E-02 |
| IL17B   | AD | 5.56 (1.5, 20.65)  | 1.03E-02 | UNC5C   | AD | 0.62 (0.39, 0.97)  | 3.81E-02 |
| INHBC   | AD | 1.19 (1.02, 1.37)  | 2.20E-02 | UNC5D   | AD | 2.43 (1.06, 5.59)  | 3.69E-02 |
| IRF3    | AD | 4.03 (1.16, 13.95) | 2.80E-02 | VOPP1   | AD | 0.17 (0.03, 0.91)  | 3.88E-02 |
| KRT20   | AD | 0.31 (0.1, 1)      | 4.96E-02 | VPS26A  | AD | 1.79 (1.11, 2.9)   | 1.77E-02 |
| LILRB1  | AD | 0.74 (0.62, 0.89)  | 1.22E-03 | ZYX     | AD | 4.84 (1.52, 15.42) | 7.57E-03 |
| LMAN2L  | AD | 7.29 (1.37, 38.86) | 2.00E-02 |         |    |                    |          |

---

**Table S5.** Functional enrichment analysis of causal proteins associated with essential hypertension (UKB).

| Type | Description                                                                          | GeneRatio | BgRatio   | RichFactor | FoldEnrichment | zScore | pvalue   | p.adjust |
|------|--------------------------------------------------------------------------------------|-----------|-----------|------------|----------------|--------|----------|----------|
| BP   | positive regulation of kinase activity                                               | 12/111    | 337/18870 | 0.04       | 6.05           | 7.20   | 7.02E-07 | 1.16E-03 |
| BP   | positive regulation of transferase activity                                          | 13/111    | 414/18870 | 0.03       | 5.34           | 6.87   | 9.69E-07 | 1.16E-03 |
| BP   | peptidyl-tyrosine phosphorylation                                                    | 10/111    | 276/18870 | 0.04       | 6.16           | 6.64   | 5.36E-06 | 3.42E-03 |
| BP   | peptidyl-tyrosine modification                                                       | 10/111    | 278/18870 | 0.04       | 6.12           | 6.61   | 5.71E-06 | 3.42E-03 |
| BP   | positive regulation of protein kinase B signaling                                    | 8/111     | 171/18870 | 0.05       | 7.95           | 7.03   | 7.71E-06 | 3.69E-03 |
| BP   | positive regulation of cytokine production                                           | 12/111    | 499/18870 | 0.02       | 4.09           | 5.38   | 3.77E-05 | 1.50E-02 |
| BP   | protein kinase B signaling                                                           | 9/111     | 290/18870 | 0.03       | 5.28           | 5.64   | 5.43E-05 | 1.83E-02 |
| BP   | positive regulation of peptidyl-tyrosine phosphorylation                             | 7/111     | 168/18870 | 0.04       | 7.08           | 6.09   | 6.11E-05 | 1.83E-02 |
| BP   | regulation of immune effector process                                                | 10/111    | 389/18870 | 0.03       | 4.37           | 5.17   | 1.00E-04 | 2.62E-02 |
| BP   | regulation of protein kinase B signaling                                             | 8/111     | 248/18870 | 0.03       | 5.48           | 5.47   | 1.10E-04 | 2.62E-02 |
| BP   | positive regulation of vascular endothelial growth factor receptor signaling pathway | 3/111     | 18/18870  | 0.17       | 28.33          | 8.92   | 1.52E-04 | 3.30E-02 |
| BP   | regulation of angiogenesis                                                           | 9/111     | 349/18870 | 0.03       | 4.38           | 4.91   | 2.20E-04 | 3.74E-02 |
| BP   | positive regulation of phosphatidylinositol 3-kinase activity                        | 3/111     | 21/18870  | 0.14       | 24.29          | 8.21   | 2.44E-04 | 3.74E-02 |
| BP   | regulation of extracellular matrix assembly                                          | 3/111     | 21/18870  | 0.14       | 24.29          | 8.21   | 2.44E-04 | 3.74E-02 |
| BP   | regulation of vasculature development                                                | 9/111     | 354/18870 | 0.03       | 4.32           | 4.85   | 2.45E-04 | 3.74E-02 |
| BP   | positive regulation of cell projection organization                                  | 9/111     | 355/18870 | 0.03       | 4.31           | 4.84   | 2.50E-04 | 3.74E-02 |
| BP   | substrate adhesion-dependent cell spreading                                          | 5/111     | 100/18870 | 0.05       | 8.50           | 5.78   | 3.11E-04 | 4.38E-02 |
| BP   | small molecule catabolic process                                                     | 9/111     | 375/18870 | 0.02       | 4.08           | 4.63   | 3.73E-04 | 4.97E-02 |
| KEGG | Integrin signaling                                                                   | 7/71      | 154/9521  | 0.05       | 6.10           | 5.53   | 1.41E-04 | 2.95E-02 |

**Table S6.** Functional enrichment analysis of causal proteins associated with diastolic blood pressure (UKB).

| Type | Description                                                                     | GeneRatio | BgRatio   | RichFactor | FoldEnrichment | zScore | pvalue   | p.adjust |
|------|---------------------------------------------------------------------------------|-----------|-----------|------------|----------------|--------|----------|----------|
| BP   | positive regulation of receptor signaling pathway via JAK-STAT                  | 4/84      | 49/18870  | 0.08       | 18.34          | 8.13   | 6.65E-05 | 5.00E-02 |
| BP   | positive regulation of receptor signaling pathway via STAT                      | 4/84      | 53/18870  | 0.08       | 16.95          | 7.78   | 9.06E-05 | 5.00E-02 |
| BP   | ethanol metabolic process                                                       | 3/84      | 21/18870  | 0.14       | 32.09          | 9.53   | 1.07E-04 | 5.00E-02 |
| BP   | regulation of extracellular matrix assembly                                     | 3/84      | 21/18870  | 0.14       | 32.09          | 9.53   | 1.07E-04 | 5.00E-02 |
| BP   | positive regulation of cardiac muscle hypertrophy                               | 3/84      | 35/18870  | 0.09       | 19.26          | 7.23   | 5.02E-04 | 1.42E-01 |
| BP   | positive regulation of muscle hypertrophy                                       | 3/84      | 36/18870  | 0.08       | 18.72          | 7.12   | 5.46E-04 | 1.42E-01 |
| BP   | biogenic amine metabolic process                                                | 4/84      | 99/18870  | 0.04       | 9.08           | 5.39   | 9.97E-04 | 1.42E-01 |
| BP   | negative regulation of protein serine/threonine kinase activity                 | 4/84      | 100/18870 | 0.04       | 8.99           | 5.35   | 1.04E-03 | 1.42E-01 |
| BP   | positive regulation of intracellular estrogen receptor signaling pathway        | 2/84      | 11/18870  | 0.18       | 40.84          | 8.84   | 1.05E-03 | 1.42E-01 |
| BP   | renal sodium excretion                                                          | 2/84      | 11/18870  | 0.18       | 40.84          | 8.84   | 1.05E-03 | 1.42E-01 |
| BP   | regulation of excretion                                                         | 2/84      | 11/18870  | 0.18       | 40.84          | 8.84   | 1.05E-03 | 1.42E-01 |
| BP   | receptor signaling pathway via JAK-STAT                                         | 5/84      | 174/18870 | 0.03       | 6.46           | 4.83   | 1.08E-03 | 1.42E-01 |
| BP   | extracellular matrix assembly                                                   | 3/84      | 46/18870  | 0.07       | 14.65          | 6.20   | 1.13E-03 | 1.42E-01 |
| BP   | ethanol catabolic process                                                       | 2/84      | 12/18870  | 0.17       | 37.44          | 8.44   | 1.26E-03 | 1.42E-01 |
| BP   | positive regulation of intracellular steroid hormone receptor signaling pathway | 2/84      | 12/18870  | 0.17       | 37.44          | 8.44   | 1.26E-03 | 1.42E-01 |
| BP   | acute-phase response                                                            | 3/84      | 48/18870  | 0.06       | 14.04          | 6.05   | 1.27E-03 | 1.42E-01 |
| BP   | regulation of receptor signaling pathway via JAK-STAT                           | 4/84      | 106/18870 | 0.04       | 8.48           | 5.16   | 1.29E-03 | 1.42E-01 |
| BP   | alcohol metabolic process                                                       | 7/84      | 373/18870 | 0.02       | 4.22           | 4.19   | 1.37E-03 | 1.42E-01 |
| BP   | activation of Janus kinase activity                                             | 2/84      | 13/18870  | 0.15       | 34.56          | 8.09   | 1.48E-03 | 1.42E-01 |
| BP   | receptor signaling pathway via STAT                                             | 5/84      | 188/18870 | 0.03       | 5.97           | 4.58   | 1.52E-03 | 1.42E-01 |
| BP   | amine metabolic process                                                         | 4/84      | 119/18870 | 0.03       | 7.55           | 4.79   | 1.97E-03 | 1.57E-01 |
| BP   | regulation of receptor signaling pathway via STAT                               | 4/84      | 119/18870 | 0.03       | 7.55           | 4.79   | 1.97E-03 | 1.57E-01 |

|    |                                                                      |      |           |      |       |      |          |          |
|----|----------------------------------------------------------------------|------|-----------|------|-------|------|----------|----------|
| BP | primary alcohol catabolic process                                    | 2/84 | 15/18870  | 0.13 | 29.95 | 7.50 | 1.98E-03 | 1.57E-01 |
| BP | negative regulation of immune response                               | 5/84 | 205/18870 | 0.02 | 5.48  | 4.31 | 2.22E-03 | 1.57E-01 |
| BP | low-density lipoprotein particle remodeling                          | 2/84 | 16/18870  | 0.13 | 28.08 | 7.25 | 2.26E-03 | 1.57E-01 |
| BP | negative regulation of bone resorption                               | 2/84 | 16/18870  | 0.13 | 28.08 | 7.25 | 2.26E-03 | 1.57E-01 |
| BP | epithelial cell-cell adhesion                                        | 2/84 | 16/18870  | 0.13 | 28.08 | 7.25 | 2.26E-03 | 1.57E-01 |
| BP | cGMP metabolic process                                               | 2/84 | 17/18870  | 0.12 | 26.43 | 7.01 | 2.55E-03 | 1.70E-01 |
| BP | regulation of extracellular matrix organization                      | 3/84 | 62/18870  | 0.05 | 10.87 | 5.21 | 2.66E-03 | 1.70E-01 |
| BP | polyamine metabolic process                                          | 2/84 | 18/18870  | 0.11 | 24.96 | 6.80 | 2.86E-03 | 1.70E-01 |
| BP | negative regulation of bone remodeling                               | 2/84 | 18/18870  | 0.11 | 24.96 | 6.80 | 2.86E-03 | 1.70E-01 |
| BP | positive regulation of macrophage derived foam cell differentiation  | 2/84 | 19/18870  | 0.11 | 23.65 | 6.60 | 3.19E-03 | 1.70E-01 |
| BP | renal tubular secretion                                              | 2/84 | 19/18870  | 0.11 | 23.65 | 6.60 | 3.19E-03 | 1.70E-01 |
| BP | negative regulation of cell activation                               | 5/84 | 223/18870 | 0.02 | 5.04  | 4.05 | 3.19E-03 | 1.70E-01 |
| BP | regulation of cardiac muscle hypertrophy                             | 3/84 | 67/18870  | 0.04 | 10.06 | 4.97 | 3.32E-03 | 1.70E-01 |
| BP | negative regulation of toll-like receptor signaling pathway          | 2/84 | 20/18870  | 0.10 | 22.46 | 6.42 | 3.53E-03 | 1.70E-01 |
| BP | negative regulation of transcription elongation by RNA polymerase II | 2/84 | 20/18870  | 0.10 | 22.46 | 6.42 | 3.53E-03 | 1.70E-01 |
| BP | response to estrogen                                                 | 3/84 | 69/18870  | 0.04 | 9.77  | 4.88 | 3.61E-03 | 1.70E-01 |
| BP | cell junction assembly                                               | 7/84 | 446/18870 | 0.02 | 3.53  | 3.61 | 3.73E-03 | 1.70E-01 |
| BP | regulation of muscle hypertrophy                                     | 3/84 | 70/18870  | 0.04 | 9.63  | 4.84 | 3.76E-03 | 1.70E-01 |
| BP | negative regulation of tissue remodeling                             | 2/84 | 21/18870  | 0.10 | 21.39 | 6.25 | 3.89E-03 | 1.70E-01 |
| BP | negative regulation of phagocytosis                                  | 2/84 | 21/18870  | 0.10 | 21.39 | 6.25 | 3.89E-03 | 1.70E-01 |
| BP | positive regulation of kinase activity                               | 6/84 | 337/18870 | 0.02 | 4.00  | 3.72 | 3.92E-03 | 1.70E-01 |
| BP | phagocytosis                                                         | 5/84 | 237/18870 | 0.02 | 4.74  | 3.87 | 4.14E-03 | 1.70E-01 |
| BP | regulation of renal system process                                   | 2/84 | 22/18870  | 0.09 | 20.42 | 6.09 | 4.27E-03 | 1.70E-01 |
| BP | negative regulation of angiogenesis                                  | 4/84 | 150/18870 | 0.03 | 5.99  | 4.10 | 4.52E-03 | 1.70E-01 |

|      |                                                                |      |           |      |       |      |          |          |
|------|----------------------------------------------------------------|------|-----------|------|-------|------|----------|----------|
| BP   | negative regulation of endocytosis                             | 3/84 | 75/18870  | 0.04 | 8.99  | 4.63 | 4.56E-03 | 1.70E-01 |
| BP   | negative regulation of DNA-templated transcription, elongation | 2/84 | 23/18870  | 0.09 | 19.53 | 5.95 | 4.66E-03 | 1.70E-01 |
| BP   | peptide catabolic process                                      | 2/84 | 23/18870  | 0.09 | 19.53 | 5.95 | 4.66E-03 | 1.70E-01 |
| BP   | AMP metabolic process                                          | 2/84 | 23/18870  | 0.09 | 19.53 | 5.95 | 4.66E-03 | 1.70E-01 |
| BP   | negative regulation of blood vessel morphogenesis              | 4/84 | 152/18870 | 0.03 | 5.91  | 4.07 | 4.74E-03 | 1.70E-01 |
| BP   | negative regulation of vasculature development                 | 4/84 | 153/18870 | 0.03 | 5.87  | 4.05 | 4.85E-03 | 1.70E-01 |
| BP   | nucleoside monophosphate metabolic process                     | 3/84 | 77/18870  | 0.04 | 8.75  | 4.56 | 4.91E-03 | 1.70E-01 |
| KEGG | Fatty acid degradation                                         | 3/45 | 43/9521   | 0.07 | 14.76 | 6.23 | 1.07E-03 | 1.22E-01 |
| KEGG | Arginine and proline metabolism                                | 3/45 | 50/9521   | 0.06 | 12.69 | 5.71 | 1.66E-03 | 1.22E-01 |
| KEGG | Histidine metabolism                                           | 2/45 | 22/9521   | 0.09 | 19.23 | 5.90 | 4.75E-03 | 1.53E-01 |

---

**Table S7.** Functional enrichment analysis of causal proteins associated with aortic dissection.

| Type | Description                                                                                                                             | GeneRatio | BgRatio   | RichFactor | FoldEnrichment | zScore | pvalue   | p.adjust |
|------|-----------------------------------------------------------------------------------------------------------------------------------------|-----------|-----------|------------|----------------|--------|----------|----------|
| BP   | cell killing                                                                                                                            | 8/69      | 223/18870 | 0.04       | 9.81           | 8.02   | 1.51E-06 | 1.72E-03 |
| BP   | regulation of cell killing                                                                                                              | 6/69      | 111/18870 | 0.05       | 14.78          | 8.82   | 3.21E-06 | 1.72E-03 |
| BP   | regulation of leukocyte mediated immunity                                                                                               | 8/69      | 249/18870 | 0.03       | 8.79           | 7.49   | 3.43E-06 | 1.72E-03 |
| BP   | regulation of lymphocyte mediated immunity                                                                                              | 7/69      | 188/18870 | 0.04       | 10.18          | 7.67   | 5.58E-06 | 1.87E-03 |
| BP   | positive regulation of immune effector process                                                                                          | 8/69      | 270/18870 | 0.03       | 8.10           | 7.12   | 6.23E-06 | 1.87E-03 |
| BP   | regulation of immune effector process                                                                                                   | 9/69      | 389/18870 | 0.02       | 6.33           | 6.43   | 1.17E-05 | 2.92E-03 |
| BP   | positive regulation of leukocyte mediated immunity                                                                                      | 6/69      | 151/18870 | 0.04       | 10.87          | 7.37   | 1.88E-05 | 4.04E-03 |
| BP   | regulation of adaptive immune response based on somatic recombination of immune receptors built from immunoglobulin superfamily domains | 6/69      | 193/18870 | 0.03       | 8.50           | 6.35   | 7.43E-05 | 1.36E-02 |
| BP   | positive regulation of cytokine production                                                                                              | 9/69      | 499/18870 | 0.02       | 4.93           | 5.39   | 8.15E-05 | 1.36E-02 |
| BP   | positive regulation of lymphocyte mediated immunity                                                                                     | 5/69      | 129/18870 | 0.04       | 10.60          | 6.63   | 1.09E-04 | 1.54E-02 |
| BP   | regulation of adaptive immune response                                                                                                  | 6/69      | 208/18870 | 0.03       | 7.89           | 6.05   | 1.12E-04 | 1.54E-02 |
| BP   | positive regulation of cell killing                                                                                                     | 4/69      | 76/18870  | 0.05       | 14.39          | 7.09   | 1.72E-04 | 2.16E-02 |
| BP   | leukocyte mediated immunity                                                                                                             | 8/69      | 466/18870 | 0.02       | 4.69           | 4.89   | 2.91E-04 | 3.34E-02 |
| BP   | positive regulation of T cell activation                                                                                                | 6/69      | 251/18870 | 0.02       | 6.54           | 5.35   | 3.10E-04 | 3.34E-02 |
| BP   | positive regulation of cell adhesion                                                                                                    | 8/69      | 482/18870 | 0.02       | 4.54           | 4.77   | 3.65E-04 | 3.64E-02 |
| BP   | lymphocyte mediated immunity                                                                                                            | 7/69      | 368/18870 | 0.02       | 5.20           | 4.93   | 3.87E-04 | 3.64E-02 |
| BP   | regulation of leukocyte mediated cytotoxicity                                                                                           | 4/69      | 96/18870  | 0.04       | 11.39          | 6.19   | 4.22E-04 | 3.74E-02 |
| BP   | positive regulation of leukocyte cell-cell adhesion                                                                                     | 6/69      | 275/18870 | 0.02       | 5.97           | 5.03   | 5.04E-04 | 3.91E-02 |
| BP   | positive regulation of B cell mediated immunity                                                                                         | 3/69      | 43/18870  | 0.07       | 19.08          | 7.19   | 5.20E-04 | 3.91E-02 |
| BP   | positive regulation of immunoglobulin mediated immune response                                                                          | 3/69      | 43/18870  | 0.07       | 19.08          | 7.19   | 5.20E-04 | 3.91E-02 |
| BP   | cellular response to leukemia inhibitory factor                                                                                         | 4/69      | 104/18870 | 0.04       | 10.52          | 5.90   | 5.72E-04 | 3.98E-02 |
| BP   | positive regulation of cell activation                                                                                                  | 7/69      | 396/18870 | 0.02       | 4.83           | 4.67   | 5.99E-04 | 3.98E-02 |

|    |                                                         |      |           |      |       |      |          |          |
|----|---------------------------------------------------------|------|-----------|------|-------|------|----------|----------|
| BP | response to leukemia inhibitory factor                  | 4/69 | 106/18870 | 0.04 | 10.32 | 5.83 | 6.14E-04 | 3.98E-02 |
| BP | dendritic cell differentiation                          | 3/69 | 46/18870  | 0.07 | 17.84 | 6.93 | 6.35E-04 | 3.98E-02 |
| BP | regulation of neuron migration                          | 3/69 | 48/18870  | 0.06 | 17.09 | 6.76 | 7.19E-04 | 4.33E-02 |
| BP | regulation of natural killer cell mediated cytotoxicity | 3/69 | 49/18870  | 0.06 | 16.74 | 6.68 | 7.64E-04 | 4.42E-02 |
| BP | dendritic cell apoptotic process                        | 2/69 | 12/18870  | 0.17 | 45.58 | 9.36 | 8.49E-04 | 4.57E-02 |
| BP | regulation of dendritic cell apoptotic process          | 2/69 | 12/18870  | 0.17 | 45.58 | 9.36 | 8.49E-04 | 4.57E-02 |
| BP | regulation of natural killer cell mediated immunity     | 3/69 | 53/18870  | 0.06 | 15.48 | 6.39 | 9.62E-04 | 4.99E-02 |

---

**Table S8.** Bayesian colocalization analysis for candidate proteins to blood pressure traits (UKB) and aortic dissection.

| Exposure | Outcome | nSNP  | PP.H0.abf | PP.H1.abf | PP.H2.abf | PP.H3.abf | PP.H4.abf |
|----------|---------|-------|-----------|-----------|-----------|-----------|-----------|
| GHR      | HTN     | 12237 | 0.00%     | 0.11%     | 0.00%     | 99.64%    | 0.25%     |
| IL13RA1  | HTN     | 8473  | 0.00%     | 0.73%     | 0.00%     | 59.57%    | 39.70%    |
| NQO1     | HTN     | 11864 | 0.00%     | 0.05%     | 0.00%     | 99.95%    | 0.00%     |
| POR      | HTN     | 10932 | 0.00%     | 0.00%     | 0.00%     | 100.00%   | 0.00%     |
| RIGI     | HTN     | 13432 | 0.00%     | 65.23%    | 0.00%     | 34.53%    | 0.24%     |
| CCN3     | DBP     | 12182 | 0.00%     | 0.00%     | 0.00%     | 7.90%     | 92.10%    |
| COL6A3   | DBP     | 13582 | 0.00%     | 53.09%    | 0.00%     | 32.40%    | 14.51%    |
| NPPB     | DBP     | 12499 | 0.00%     | 0.00%     | 0.00%     | 100.00%   | 0.00%     |
| SHMT1    | DBP     | 9599  | 0.00%     | 6.56%     | 0.00%     | 93.39%    | 0.04%     |
| CCN3     | AD      | 10064 | 0.00%     | 47.16%    | 0.00%     | 43.62%    | 9.22%     |
| COL6A3   | AD      | 11020 | 0.00%     | 12.82%    | 0.00%     | 15.58%    | 71.60%    |
| GHR      | AD      | 9953  | 0.00%     | 25.47%    | 0.00%     | 51.96%    | 22.58%    |
| IL13RA1  | AD      | 6506  | 0.00%     | 42.91%    | 0.00%     | 55.15%    | 1.94%     |
| NPPB     | AD      | 10291 | 0.00%     | 49.73%    | 0.00%     | 47.30%    | 2.97%     |
| NQO1     | AD      | 8163  | 0.00%     | 24.27%    | 0.00%     | 29.59%    | 46.13%    |
| POR      | AD      | 8107  | 0.00%     | 55.98%    | 0.00%     | 38.91%    | 5.11%     |
| RIGI     | AD      | 11010 | 0.00%     | 56.05%    | 0.00%     | 41.52%    | 2.43%     |
| SHMT1    | AD      | 6697  | 0.00%     | 61.77%    | 0.00%     | 36.77%    | 1.46%     |

**Table S9.** Multi-trait colocalization analysis of candidate proteins, essential hypertension (UKB), and aortic dissection.

| TraitID | coloc_ppas | best.snp.coloc | nSNP | Traits                       |
|---------|------------|----------------|------|------------------------------|
| ab      | 0.17%      | rs4357043      | 8894 | a = GHR, b = HTN, c = AD     |
| ac      | 4.13%      | rs4357043      | 8894 | a = GHR, b = HTN, c = AD     |
| bc      | 0.22%      | rs10941611     | 8894 | a = GHR, b = HTN, c = AD     |
| abc     | 0.01%      | rs4357043      | 8894 | a = GHR, b = HTN, c = AD     |
| ab      | 23.27%     | rs2495635      | 5797 | a = IL13RA1, b = HTN, c = AD |
| ac      | 0.12%      | rs2255275      | 5797 | a = IL13RA1, b = HTN, c = AD |
| bc      | 0.32%      | rs5957062      | 5797 | a = IL13RA1, b = HTN, c = AD |
| abc     | 0.03%      | rs2495635      | 5797 | a = IL13RA1, b = HTN, c = AD |
| ab      | 0.00%      | rs2161631      | 7289 | a = NQO1, b = HTN, c = AD    |
| ac      | 3.32%      | rs2161631      | 7289 | a = NQO1, b = HTN, c = AD    |
| bc      | 0.80%      | rs2161631      | 7289 | a = NQO1, b = HTN, c = AD    |
| abc     | 0.00%      | rs2161631      | 7289 | a = NQO1, b = HTN, c = AD    |
| ab      | 0.00%      | rs59882870     | 7114 | a = POR, b = HTN, c = AD     |
| ac      | 0.40%      | rs59882870     | 7114 | a = POR, b = HTN, c = AD     |
| bc      | 3.65%      | rs59882870     | 7114 | a = POR, b = HTN, c = AD     |
| abc     | 0.00%      | rs59882870     | 7114 | a = POR, b = HTN, c = AD     |
| ab      | 0.11%      | rs1133071      | 9925 | a = RIGI, b = HTN, c = AD    |
| ac      | 0.19%      | rs1133071      | 9925 | a = RIGI, b = HTN, c = AD    |
| bc      | 0.41%      | rs1133071      | 9925 | a = RIGI, b = HTN, c = AD    |
| abc     | 0.00%      | rs1133071      | 9925 | a = RIGI, b = HTN, c = AD    |

**Table S10.** Multi-trait colocalization analysis of candidate proteins, diastolic blood pressure (UKB), and aortic dissection.

| TraitID | coloc_ppas | best.snp.coloc | nSNP | Traits                      |
|---------|------------|----------------|------|-----------------------------|
| ab      | 92.08%     | rs56013326     | 9021 | a = CCN3, b = DBP, c = AD   |
| ac      | 1.77%      | rs11782222     | 9021 | a = CCN3, b = DBP, c = AD   |
| bc      | 1.80%      | rs57333327     | 9021 | a = CCN3, b = DBP, c = AD   |
| abc     | 1.66%      | rs57333327     | 9021 | a = CCN3, b = DBP, c = AD   |
| ab      | 17.45%     | rs2029998      | 9919 | a = COL6A3, b = DBP, c = AD |
| ac      | 28.45%     | rs2029998      | 9919 | a = COL6A3, b = DBP, c = AD |
| bc      | 5.80%      | rs2029998      | 9919 | a = COL6A3, b = DBP, c = AD |
| abc     | 5.46%      | rs2029998      | 9919 | a = COL6A3, b = DBP, c = AD |
| ab      | 0.00%      | rs198389       | 8800 | a = NPPB, b = DBP, c = AD   |
| ac      | 0.14%      | rs198389       | 8800 | a = NPPB, b = DBP, c = AD   |
| bc      | 0.39%      | rs198389       | 8800 | a = NPPB, b = DBP, c = AD   |
| abc     | 0.00%      | rs198389       | 8800 | a = NPPB, b = DBP, c = AD   |
| ab      | 0.02%      | rs652093       | 6003 | a = SHMT1, b = DBP, c = AD  |
| ac      | 0.04%      | rs652093       | 6003 | a = SHMT1, b = DBP, c = AD  |
| bc      | 0.24%      | rs652093       | 6003 | a = SHMT1, b = DBP, c = AD  |
| abc     | 0.00%      | rs652093       | 6003 | a = SHMT1, b = DBP, c = AD  |

**Table S11.** Sensitivity analyses between candidate proteins, blood pressure traits (UKB), and aortic dissection.

| Exposure | Outcome | Method                    | nSNP | Beta  | SE   | P value  | Cochran's Q pval | MR Egger intercept pval |
|----------|---------|---------------------------|------|-------|------|----------|------------------|-------------------------|
| GHR      | HTN     | Inverse variance weighted | 2    | 0.09  | 0.02 | 8.55E-05 | 7.05E-01         |                         |
| IL13RA1  | HTN     | Inverse variance weighted | 2    | 0.05  | 0.01 | 7.94E-04 | 8.40E-01         |                         |
| NQO1     | HTN     | Inverse variance weighted | 3    | -0.08 | 0.02 | 3.46E-04 | 1.05E-01         |                         |
| NQO1     | HTN     | MR Egger                  | 3    | -0.19 | 0.07 | 2.15E-01 | 2.76E-01         | 3.43E-01                |
| NQO1     | HTN     | Weighted median           | 3    | -0.09 | 0.02 | 5.73E-08 |                  |                         |
| POR      | HTN     | Inverse variance weighted | 2    | 0.09  | 0.03 | 3.03E-03 | 6.64E-01         |                         |
| RIGI     | HTN     | Wald ratio                | 1    | 0.21  | 0.06 | 1.99E-04 |                  |                         |
| CCN3     | DBP     | Wald ratio                | 1    | -0.31 | 0.03 | 7.89E-22 |                  |                         |
| COL6A3   | DBP     | Wald ratio                | 1    | -0.10 | 0.03 | 1.61E-03 |                  |                         |
| NPPB     | DBP     | Inverse variance weighted | 3    | -0.06 | 0.02 | 1.26E-03 | 2.68E-03         | 8.42E-01                |
| NPPB     | DBP     | MR Egger                  | 3    | -0.10 | 0.02 | 1.56E-01 | 8.84E-02         | 3.30E-01                |
| NPPB     | DBP     | Weighted median           | 3    | -0.06 | 0.01 | 2.42E-13 |                  |                         |
| SHMT1    | DBP     | Inverse variance weighted | 4    | 0.02  | 0.00 | 4.71E-04 | 9.96E-01         |                         |
| SHMT1    | DBP     | MR Egger                  | 4    | 0.01  | 0.02 | 5.34E-01 | 9.96E-01         |                         |
| SHMT1    | DBP     | Weighted median           | 4    | 0.02  | 0.01 | 2.75E-03 |                  |                         |
| CCN3     | AD      | Wald ratio                | 1    | -1.50 | 0.71 | 3.53E-02 |                  |                         |
| COL6A3   | AD      | Wald ratio                | 1    | -2.08 | 0.62 | 8.00E-04 |                  |                         |
| GHR      | AD      | Inverse variance weighted | 2    | 0.61  | 0.22 | 5.27E-03 | 7.55E-01         |                         |
| IL13RA1  | AD      | Inverse variance weighted | 2    | 0.46  | 0.11 | 6.18E-05 | 6.57E-01         |                         |
| NPPB     | AD      | Inverse variance weighted | 3    | -0.31 | 0.16 | 4.88E-02 | 9.04E-01         |                         |
| NPPB     | AD      | MR Egger                  | 3    | -0.22 | 0.28 | 5.81E-01 | 8.15E-01         | 7.67E-01                |
| NPPB     | AD      | Weighted median           | 3    | -0.31 | 0.17 | 6.21E-02 |                  |                         |
| NQO1     | AD      | Inverse variance weighted | 3    | -0.32 | 0.15 | 2.99E-02 | 8.18E-01         |                         |
| NQO1     | AD      | MR Egger                  | 3    | -0.61 | 0.62 | 5.04E-01 | 6.84E-01         | 7.12E-01                |

|       |    |                           |   |       |      |          |          |          |
|-------|----|---------------------------|---|-------|------|----------|----------|----------|
| NQO1  | AD | Weighted median           | 3 | -0.34 | 0.15 | 2.69E-02 |          |          |
| POR   | AD | Inverse variance weighted | 2 | 0.46  | 0.22 | 3.90E-02 | 4.93E-01 |          |
| RIGI  | AD | Wald ratio                | 1 | 1.28  | 0.51 | 1.21E-02 |          |          |
| SHMT1 | AD | Inverse variance weighted | 4 | -0.21 | 0.10 | 3.33E-02 | 3.83E-01 |          |
| SHMT1 | AD | MR Egger                  | 4 | 0.11  | 0.35 | 7.83E-01 | 3.46E-01 | 4.47E-01 |
| SHMT1 | AD | Weighted median           | 4 | -0.20 | 0.11 | 6.79E-01 |          |          |

---

**Table S12.** Mediation effect of blood pressure traits (UKB) on protein-associated aortic dissection.

| Exposure | Mediator | Outcome | Beta (95% CI)        | Proportion (95% CI)      | P value  |
|----------|----------|---------|----------------------|--------------------------|----------|
| GHR      | HTN      | AD      | 0.04 (0.01, 0.06)    | 6.28% (2.16%, 10.40%)    | 2.81E-03 |
| IL13RA1  | HTN      | AD      | 0.02 (0.01, 0.04)    | 4.49% (1.24%, 7.74%)     | 6.71E-03 |
| NQO1     | HTN      | AD      | -0.03 (-0.06, -0.01) | 10.86% (3.33%, 18.40%)   | 4.73E-03 |
| POR      | HTN      | AD      | 0.04 (0.01, 0.06)    | 7.91% (1.69%, 14.13%)    | 1.27E-02 |
| RIGI     | HTN      | AD      | 0.09 (0.03, 0.15)    | 6.96% (2.24%, 11.67%)    | 3.82E-03 |
| CCN3     | DBP      | AD      | -0.34 (-0.5, -0.18)  | 22.74% (12.14%, 33.35%)  | 2.63E-05 |
| COL6A3   | DBP      | AD      | -0.11 (-0.2, -0.03)  | 5.43% (1.36%, 9.51%)     | 8.93E-03 |
| NPPB     | DBP      | AD      | -0.07 (-0.12, -0.02) | 21.47% (5.62%, 37.31%)   | 7.94E-03 |
| SHMT1    | DBP      | AD      | 0.02 (0.01, 0.03)    | -8.55% (-14.54%, -2.57%) | 5.11E-03 |

**Table S13.** Causal association between blood pressure traits (MVP) and aortic dissection.

| Exposure | Outcome           | Method                        | nSNP | Beta  | SE   | P value  | Adjusted P |
|----------|-------------------|-------------------------------|------|-------|------|----------|------------|
| HTN      | Aortic dissection | Inverse variance weighted     | 176  | 0.38  | 0.09 | 8.92E-06 | 3.35E-05   |
| HTN      | Aortic dissection | MR Egger                      | 176  | 0.44  | 0.30 | 1.43E-01 | 2.38E-01   |
| HTN      | Aortic dissection | Weighted median               | 176  | 0.30  | 0.13 | 2.10E-02 | 3.94E-02   |
| HTN      | Aortic dissection | MR-PRESSO (Raw)               | 176  | 0.38  | 0.09 | 1.58E-05 | 4.73E-05   |
| HTN      | Aortic dissection | MR-PRESSO (Outlier-corrected) |      |       |      | NA       |            |
| SBP      | Aortic dissection | Inverse variance weighted     | 297  | 0.05  | 0.15 | 7.52E-01 | 8.06E-01   |
| SBP      | Aortic dissection | MR Egger                      | 297  | -0.42 | 0.48 | 3.83E-01 | 4.78E-01   |
| SBP      | Aortic dissection | Weighted median               | 297  | 0.18  | 0.20 | 3.65E-01 | 4.78E-01   |
| SBP      | Aortic dissection | MR-PRESSO (Raw)               | 297  | 0.05  | 0.15 | 7.52E-01 | 8.06E-01   |
| SBP      | Aortic dissection | MR-PRESSO (Outlier-corrected) | 291  | 0.19  | 0.14 | 1.93E-01 | 2.89E-01   |
| DBP      | Aortic dissection | Inverse variance weighted     | 199  | 1.29  | 0.19 | 4.97E-12 | 7.46E-11   |
| DBP      | Aortic dissection | MR Egger                      | 199  | 1.86  | 0.66 | 5.07E-03 | 1.09E-02   |
| DBP      | Aortic dissection | Weighted median               | 199  | 1.02  | 0.25 | 3.34E-05 | 8.35E-05   |
| DBP      | Aortic dissection | MR-PRESSO (Raw)               | 199  | 1.29  | 0.19 | 6.61E-11 | 4.96E-10   |
| DBP      | Aortic dissection | MR-PRESSO (Outlier-corrected) | 194  | 1.20  | 0.18 | 1.16E-10 | 5.78E-10   |

**Table S14.** Causal association between plasma proteins and essential hypertension (MVP).

| Exposure | Outcome | Beta  | SE   | P value  | Adjusted P | Exposure | Outcome | Beta  | SE   | P value  | Adjusted P |
|----------|---------|-------|------|----------|------------|----------|---------|-------|------|----------|------------|
| A4GNT    | HTN     | 0.24  | 0.08 | 2.01E-03 | 2.89E-02   | ITIH1    | HTN     | -0.06 | 0.02 | 1.18E-03 | 2.15E-02   |
| ACADVL   | HTN     | -0.47 | 0.10 | 1.67E-06 | 1.05E-04   | ITIH4    | HTN     | 0.23  | 0.06 | 1.29E-04 | 4.22E-03   |
| ACE      | HTN     | 0.06  | 0.02 | 1.94E-03 | 2.89E-02   | ITPKA    | HTN     | 0.33  | 0.08 | 1.60E-05 | 7.74E-04   |
| ADAMTSL2 | HTN     | -0.13 | 0.04 | 2.29E-03 | 3.09E-02   | IVD      | HTN     | -0.14 | 0.04 | 2.73E-04 | 7.49E-03   |
| ADH5     | HTN     | 0.11  | 0.03 | 2.57E-04 | 7.17E-03   | KLC1     | HTN     | 0.23  | 0.06 | 1.28E-04 | 4.22E-03   |
| ADH6     | HTN     | 0.10  | 0.03 | 1.12E-03 | 2.06E-02   | KNG1     | HTN     | 0.05  | 0.02 | 2.65E-03 | 3.36E-02   |
| AGRN     | HTN     | 0.07  | 0.02 | 2.16E-04 | 6.38E-03   | KYAT3    | HTN     | -0.10 | 0.02 | 4.85E-07 | 3.48E-05   |
| AGT      | HTN     | 0.16  | 0.03 | 9.45E-10 | 1.42E-07   | LAYN     | HTN     | -0.40 | 0.09 | 2.31E-05 | 1.05E-03   |
| AK1      | HTN     | -0.29 | 0.09 | 1.52E-03 | 2.60E-02   | LGALS4   | HTN     | -0.30 | 0.09 | 7.67E-04 | 1.52E-02   |
| ALDH2    | HTN     | 0.58  | 0.07 | 5.81E-15 | 4.38E-12   | LHB      | HTN     | -0.07 | 0.02 | 2.12E-03 | 2.93E-02   |
| ALOX15B  | HTN     | -0.25 | 0.07 | 6.50E-04 | 1.37E-02   | LIMA1    | HTN     | -0.50 | 0.08 | 2.78E-10 | 4.66E-08   |
| AMBP     | HTN     | 0.17  | 0.05 | 9.59E-04 | 1.83E-02   | LRRC15   | HTN     | -0.06 | 0.02 | 7.39E-04 | 1.51E-02   |
| ANTXR1   | HTN     | 0.39  | 0.09 | 3.30E-05 | 1.42E-03   | LRRTM4   | HTN     | -0.40 | 0.10 | 4.27E-05 | 1.79E-03   |
| ANXA11   | HTN     | 0.12  | 0.03 | 2.12E-04 | 6.38E-03   | LYZ      | HTN     | 0.05  | 0.01 | 3.68E-04 | 9.91E-03   |
| APOB     | HTN     | 0.18  | 0.06 | 2.16E-03 | 2.93E-02   | MAP3K3   | HTN     | 0.32  | 0.10 | 1.68E-03 | 2.70E-02   |
| APOC1    | HTN     | -0.31 | 0.08 | 1.14E-04 | 3.93E-03   | MAPK3    | HTN     | -0.09 | 0.02 | 1.02E-04 | 3.67E-03   |
| APOC3    | HTN     | -0.22 | 0.03 | 1.78E-11 | 6.69E-09   | MARK3    | HTN     | 0.58  | 0.11 | 4.76E-08 | 3.99E-06   |
| ARG1     | HTN     | -0.21 | 0.06 | 1.10E-03 | 2.04E-02   | MATN2    | HTN     | -0.13 | 0.04 | 2.04E-03 | 2.89E-02   |
| ARHGEF25 | HTN     | 0.13  | 0.05 | 4.41E-03 | 4.55E-02   | MDH1     | HTN     | -0.24 | 0.08 | 1.74E-03 | 2.75E-02   |
| ARL3     | HTN     | 0.19  | 0.03 | 1.62E-10 | 3.05E-08   | METAP1   | HTN     | 0.23  | 0.07 | 1.66E-03 | 2.70E-02   |
| ASAH2    | HTN     | -0.07 | 0.02 | 4.15E-03 | 4.38E-02   | MSR1     | HTN     | 0.07  | 0.02 | 1.75E-03 | 2.75E-02   |
| ASIP     | HTN     | -0.07 | 0.02 | 6.54E-04 | 1.37E-02   | NADK     | HTN     | -0.18 | 0.04 | 4.19E-06 | 2.43E-04   |
| ATRN     | HTN     | -0.04 | 0.01 | 2.83E-03 | 3.49E-02   | NAPG     | HTN     | 0.22  | 0.08 | 3.95E-03 | 4.25E-02   |
| AZGP1    | HTN     | -0.09 | 0.02 | 1.15E-04 | 3.93E-03   | NCAN     | HTN     | -0.10 | 0.03 | 1.60E-03 | 2.69E-02   |

|         |     |       |      |          |          |         |     |       |      |          |          |
|---------|-----|-------|------|----------|----------|---------|-----|-------|------|----------|----------|
| BMP7    | HTN | -0.30 | 0.10 | 3.00E-03 | 3.65E-02 | NCF1    | HTN | 0.18  | 0.03 | 1.67E-08 | 1.68E-06 |
| BRD2    | HTN | 0.44  | 0.15 | 2.99E-03 | 3.65E-02 | NDE1    | HTN | 0.48  | 0.08 | 1.54E-09 | 2.10E-07 |
| CALB2   | HTN | 0.25  | 0.09 | 4.82E-03 | 4.91E-02 | NEGR1   | HTN | -0.15 | 0.04 | 7.78E-04 | 1.52E-02 |
| CAT     | HTN | 0.08  | 0.03 | 1.80E-03 | 2.75E-02 | NEGR1   | HTN | -0.15 | 0.05 | 3.23E-03 | 3.78E-02 |
| CCDC50  | HTN | -0.35 | 0.11 | 1.80E-03 | 2.75E-02 | NLGN1   | HTN | 0.14  | 0.04 | 8.62E-05 | 3.33E-03 |
| CCL17   | HTN | 0.07  | 0.02 | 4.85E-03 | 4.91E-02 | NMB     | HTN | -0.12 | 0.03 | 2.36E-04 | 6.71E-03 |
| CCN3    | HTN | 0.22  | 0.07 | 6.12E-04 | 1.36E-02 | NME4    | HTN | 0.30  | 0.09 | 5.65E-04 | 1.33E-02 |
| CD46    | HTN | -0.08 | 0.02 | 6.15E-04 | 1.36E-02 | NMRAL1  | HTN | 0.06  | 0.02 | 6.64E-04 | 1.37E-02 |
| CD72    | HTN | 0.13  | 0.05 | 4.75E-03 | 4.87E-02 | NMT1    | HTN | 0.59  | 0.12 | 5.36E-07 | 3.67E-05 |
| CDH5    | HTN | -0.15 | 0.03 | 1.86E-06 | 1.12E-04 | NPNT    | HTN | 0.09  | 0.03 | 2.41E-03 | 3.19E-02 |
| CFI     | HTN | -0.29 | 0.10 | 3.14E-03 | 3.73E-02 | NPPB    | HTN | -0.51 | 0.06 | 8.13E-20 | 1.23E-16 |
| CHMP3   | HTN | -0.45 | 0.10 | 5.94E-06 | 3.20E-04 | NPPB    | HTN | -0.16 | 0.05 | 5.45E-04 | 1.33E-02 |
| CLEC11A | HTN | -0.09 | 0.02 | 1.54E-04 | 4.85E-03 | NQO1    | HTN | -0.10 | 0.02 | 1.99E-09 | 2.51E-07 |
| CNPY3   | HTN | -0.16 | 0.04 | 8.90E-05 | 3.35E-03 | NRP2    | HTN | -0.14 | 0.04 | 4.38E-04 | 1.10E-02 |
| COMT    | HTN | -0.21 | 0.06 | 4.61E-04 | 1.14E-02 | NUDT2   | HTN | -0.06 | 0.02 | 2.78E-03 | 3.46E-02 |
| CRAT    | HTN | 0.19  | 0.06 | 1.26E-03 | 2.23E-02 | NUDT9   | HTN | -0.16 | 0.05 | 8.40E-04 | 1.62E-02 |
| CREB3L4 | HTN | -0.08 | 0.02 | 4.39E-04 | 1.10E-02 | OLFML3  | HTN | 0.18  | 0.06 | 1.80E-03 | 2.75E-02 |
| CRLF1   | HTN | -0.07 | 0.02 | 2.05E-03 | 2.89E-02 | PDK1    | HTN | 0.25  | 0.08 | 2.46E-03 | 3.23E-02 |
| CSK     | HTN | 0.62  | 0.08 | 1.74E-14 | 8.75E-12 | PDXK    | HTN | -0.27 | 0.04 | 3.48E-11 | 1.05E-08 |
| CSNK2B  | HTN | 0.59  | 0.20 | 3.36E-03 | 3.86E-02 | PFKM    | HTN | 0.09  | 0.03 | 2.05E-03 | 2.89E-02 |
| DBI     | HTN | -0.06 | 0.02 | 3.08E-03 | 3.71E-02 | PGP     | HTN | 0.18  | 0.03 | 1.01E-07 | 8.00E-06 |
| DEF6    | HTN | -0.07 | 0.03 | 4.96E-03 | 4.98E-02 | PLEKHA7 | HTN | 0.11  | 0.02 | 2.59E-07 | 1.95E-05 |
| DUSP13B | HTN | -0.17 | 0.05 | 1.63E-03 | 2.70E-02 | PTK7    | HTN | 0.22  | 0.06 | 1.02E-04 | 3.67E-03 |
| DYNLL2  | HTN | -0.30 | 0.09 | 1.27E-03 | 2.23E-02 | PTN     | HTN | -0.10 | 0.03 | 2.40E-03 | 3.19E-02 |
| EGLN1   | HTN | 0.21  | 0.07 | 3.74E-03 | 4.08E-02 | QDPR    | HTN | 0.04  | 0.01 | 2.00E-03 | 2.89E-02 |
| EMILIN3 | HTN | -0.06 | 0.02 | 2.68E-03 | 3.36E-02 | RAB1A   | HTN | 0.55  | 0.10 | 1.52E-08 | 1.63E-06 |

|         |     |       |      |          |          |          |     |       |      |          |          |
|---------|-----|-------|------|----------|----------|----------|-----|-------|------|----------|----------|
| ENPEP   | HTN | -0.06 | 0.02 | 6.76E-05 | 2.68E-03 | RARRES1  | HTN | 0.04  | 0.01 | 3.62E-03 | 3.99E-02 |
| ENTPD6  | HTN | 0.13  | 0.04 | 2.11E-03 | 2.93E-02 | RARRES2  | HTN | -0.08 | 0.03 | 2.53E-03 | 3.24E-02 |
| EPHB6   | HTN | 0.10  | 0.02 | 1.23E-05 | 6.20E-04 | ROR2     | HTN | -0.12 | 0.04 | 1.88E-03 | 2.83E-02 |
| ESAM    | HTN | -0.12 | 0.04 | 7.57E-04 | 1.52E-02 | RPS6KA1  | HTN | 0.18  | 0.05 | 6.23E-04 | 1.36E-02 |
| F2      | HTN | 0.16  | 0.06 | 4.03E-03 | 4.28E-02 | SAT2     | HTN | 0.10  | 0.02 | 3.10E-05 | 1.38E-03 |
| F2      | HTN | 0.18  | 0.06 | 4.03E-03 | 4.28E-02 | SCARF1   | HTN | 0.08  | 0.02 | 1.07E-05 | 5.57E-04 |
| FABP2   | HTN | -0.06 | 0.01 | 4.49E-06 | 2.51E-04 | SDF2     | HTN | -0.10 | 0.02 | 1.02E-06 | 6.68E-05 |
| FAM171B | HTN | 0.11  | 0.04 | 3.49E-03 | 3.95E-02 | SEMA6A   | HTN | -0.28 | 0.08 | 5.65E-04 | 1.33E-02 |
| FCN1    | HTN | 0.05  | 0.02 | 2.52E-03 | 3.24E-02 | SFRP4    | HTN | 0.07  | 0.02 | 2.49E-03 | 3.23E-02 |
| FCN3    | HTN | 0.04  | 0.01 | 1.02E-03 | 1.92E-02 | SHMT1    | HTN | 0.07  | 0.03 | 3.29E-03 | 3.82E-02 |
| FN1     | HTN | 0.09  | 0.03 | 3.54E-03 | 3.95E-02 | SNAP29   | HTN | -0.19 | 0.07 | 3.21E-03 | 3.78E-02 |
| FN1     | HTN | 0.09  | 0.03 | 3.54E-03 | 3.95E-02 | SYT11    | HTN | -0.25 | 0.09 | 4.36E-03 | 4.54E-02 |
| FN1     | HTN | -0.08 | 0.03 | 3.90E-03 | 4.23E-02 | TBCE     | HTN | -0.17 | 0.05 | 4.14E-04 | 1.10E-02 |
| FSTL3   | HTN | -0.28 | 0.07 | 1.59E-04 | 4.89E-03 | TCEA2    | HTN | -0.20 | 0.04 | 7.32E-09 | 8.49E-07 |
| GAS6    | HTN | -0.06 | 0.02 | 3.53E-03 | 3.95E-02 | TCN2     | HTN | -0.04 | 0.01 | 5.36E-05 | 2.18E-03 |
| GSTP1   | HTN | 0.13  | 0.04 | 1.27E-03 | 2.23E-02 | TFRC     | HTN | -0.22 | 0.06 | 2.22E-04 | 6.44E-03 |
| H1-10   | HTN | -0.38 | 0.12 | 1.57E-03 | 2.65E-02 | THBS1    | HTN | -0.33 | 0.11 | 1.68E-03 | 2.70E-02 |
| HEXIM1  | HTN | 0.27  | 0.07 | 1.49E-04 | 4.77E-03 | TIE1     | HTN | -0.09 | 0.03 | 4.36E-04 | 1.10E-02 |
| HEXIM2  | HTN | 0.22  | 0.07 | 1.51E-03 | 2.60E-02 | TMEM106B | HTN | -0.24 | 0.04 | 2.72E-08 | 2.56E-06 |
| HTATIP2 | HTN | 0.06  | 0.02 | 4.29E-03 | 4.50E-02 | TTL      | HTN | 0.34  | 0.11 | 3.14E-03 | 3.73E-02 |
| ICAM4   | HTN | 0.26  | 0.05 | 3.79E-08 | 3.36E-06 | ULK3     | HTN | 0.41  | 0.06 | 1.30E-10 | 2.81E-08 |
| IGLON5  | HTN | -0.21 | 0.06 | 6.17E-04 | 1.36E-02 | UROD     | HTN | 0.08  | 0.02 | 6.50E-04 | 1.37E-02 |
| INHBC   | HTN | -0.16 | 0.05 | 2.04E-03 | 2.89E-02 | VTN      | HTN | -0.05 | 0.02 | 6.08E-04 | 1.36E-02 |
| INPP5B  | HTN | 0.07  | 0.02 | 3.58E-03 | 3.96E-02 | WARS1    | HTN | 0.09  | 0.02 | 1.64E-05 | 7.74E-04 |
| ISOC1   | HTN | 0.10  | 0.03 | 2.15E-03 | 2.93E-02 | WBP2     | HTN | 0.60  | 0.09 | 8.14E-11 | 2.05E-08 |

**Table S15.** Causal association between plasma proteins and diastolic blood pressure (MVP).

| Exposure | Outcome | Beta  | SE   | P value  | Adjusted P | Exposure | Outcome | Beta  | SE   | P value  | Adjusted P |
|----------|---------|-------|------|----------|------------|----------|---------|-------|------|----------|------------|
| ACADVL   | DBP     | -0.36 | 0.05 | 9.17E-12 | 2.32E-09   | LIMA1    | DBP     | -0.15 | 0.04 | 5.42E-04 | 9.00E-03   |
| ADAMTS13 | DBP     | -0.02 | 0.01 | 1.65E-03 | 2.10E-02   | LRP11    | DBP     | 0.04  | 0.01 | 6.46E-06 | 3.17E-04   |
| ADH1C    | DBP     | -0.07 | 0.02 | 5.80E-04 | 9.39E-03   | LRRC15   | DBP     | -0.04 | 0.01 | 6.81E-06 | 3.23E-04   |
| ADK      | DBP     | -0.18 | 0.05 | 4.40E-04 | 7.86E-03   | LRRTM4   | DBP     | -0.16 | 0.05 | 3.12E-03 | 3.55E-02   |
| AGRN     | DBP     | 0.05  | 0.01 | 2.41E-06 | 1.50E-04   | LTF      | DBP     | -0.06 | 0.02 | 1.28E-04 | 3.10E-03   |
| AGT      | DBP     | 0.10  | 0.01 | 3.39E-13 | 1.72E-10   | LYZ      | DBP     | 0.03  | 0.01 | 2.00E-06 | 1.38E-04   |
| AK1      | DBP     | -0.27 | 0.05 | 1.92E-07 | 1.82E-05   | MARK3    | DBP     | 0.31  | 0.06 | 3.09E-08 | 3.35E-06   |
| ALDH1A1  | DBP     | -0.10 | 0.03 | 2.91E-04 | 5.89E-03   | MASP1    | DBP     | -0.14 | 0.03 | 2.94E-05 | 1.09E-03   |
| ALDH2    | DBP     | 0.24  | 0.04 | 6.06E-10 | 1.30E-07   | MDH1     | DBP     | -0.15 | 0.04 | 5.42E-05 | 1.68E-03   |
| ALOX15B  | DBP     | -0.17 | 0.04 | 2.48E-06 | 1.50E-04   | METAP1   | DBP     | 0.12  | 0.04 | 2.61E-03 | 3.09E-02   |
| ANTXR1   | DBP     | 0.17  | 0.05 | 1.21E-03 | 1.68E-02   | MFAP4    | DBP     | 0.05  | 0.02 | 1.54E-03 | 2.00E-02   |
| ANXA11   | DBP     | 0.05  | 0.02 | 3.31E-03 | 3.73E-02   | MSR1     | DBP     | 0.05  | 0.01 | 1.42E-04 | 3.32E-03   |
| AP2A2    | DBP     | -0.15 | 0.04 | 5.08E-04 | 8.68E-03   | MXRA7    | DBP     | -0.03 | 0.01 | 3.60E-04 | 6.93E-03   |
| APOC3    | DBP     | -0.09 | 0.02 | 2.29E-08 | 2.68E-06   | NADK     | DBP     | -0.08 | 0.02 | 9.61E-05 | 2.53E-03   |
| ARF4     | DBP     | 0.10  | 0.03 | 3.70E-03 | 4.02E-02   | NCAN     | DBP     | -0.09 | 0.02 | 4.98E-09 | 6.31E-07   |
| AZGP1    | DBP     | -0.05 | 0.01 | 4.17E-06 | 2.26E-04   | NCF1     | DBP     | 0.06  | 0.02 | 3.75E-05 | 1.24E-03   |
| BCAN     | DBP     | -0.05 | 0.02 | 6.86E-04 | 1.07E-02   | NDE1     | DBP     | 0.12  | 0.04 | 1.76E-03 | 2.21E-02   |
| BDH2     | DBP     | -0.04 | 0.01 | 1.34E-03 | 1.80E-02   | NLGN2    | DBP     | 0.18  | 0.05 | 4.56E-04 | 8.06E-03   |
| BMP1     | DBP     | 0.11  | 0.04 | 3.45E-03 | 3.86E-02   | NME2     | DBP     | 0.07  | 0.02 | 3.52E-04 | 6.86E-03   |
| BTC      | DBP     | -0.06 | 0.02 | 3.18E-04 | 6.28E-03   | NMT1     | DBP     | 0.20  | 0.05 | 1.94E-04 | 4.09E-03   |
| CALB2    | DBP     | 0.22  | 0.05 | 1.40E-05 | 5.75E-04   | NPPB     | DBP     | -0.21 | 0.03 | 2.34E-13 | 1.72E-10   |
| CCL19    | DBP     | -0.23 | 0.05 | 3.33E-05 | 1.15E-03   | NPPB     | DBP     | -0.06 | 0.02 | 5.20E-04 | 8.79E-03   |
| CCL21    | DBP     | -0.10 | 0.02 | 5.05E-05 | 1.61E-03   | NQO1     | DBP     | -0.03 | 0.01 | 1.66E-04 | 3.72E-03   |
| CCN3     | DBP     | -0.27 | 0.04 | 1.35E-12 | 5.11E-10   | NT5C2    | DBP     | 0.09  | 0.02 | 1.10E-04 | 2.83E-03   |

|         |     |       |      |          |          |          |     |       |      |          |          |
|---------|-----|-------|------|----------|----------|----------|-----|-------|------|----------|----------|
| CD48    | DBP | -0.06 | 0.02 | 4.36E-04 | 7.86E-03 | NUDCD3   | DBP | -0.11 | 0.04 | 3.62E-03 | 3.99E-02 |
| CFHR1   | DBP | -0.02 | 0.00 | 8.89E-04 | 1.30E-02 | OLFML3   | DBP | 0.09  | 0.03 | 3.77E-03 | 4.07E-02 |
| CINP    | DBP | 0.19  | 0.05 | 1.30E-04 | 3.10E-03 | PARP1    | DBP | 0.21  | 0.05 | 7.76E-05 | 2.19E-03 |
| CLEC11A | DBP | -0.03 | 0.01 | 3.85E-03 | 4.12E-02 | PCDH10   | DBP | -0.08 | 0.02 | 1.29E-05 | 5.60E-04 |
| CLINT1  | DBP | -0.20 | 0.05 | 2.85E-05 | 1.08E-03 | PCNP     | DBP | 0.09  | 0.03 | 4.78E-03 | 4.95E-02 |
| CNPY3   | DBP | -0.09 | 0.02 | 6.24E-06 | 3.16E-04 | PCOLCE   | DBP | -0.06 | 0.02 | 1.48E-04 | 3.41E-03 |
| COL6A3  | DBP | -0.17 | 0.04 | 2.37E-05 | 9.25E-04 | PCSK2    | DBP | -0.10 | 0.03 | 2.38E-03 | 2.87E-02 |
| COMT    | DBP | -0.09 | 0.03 | 2.93E-03 | 3.37E-02 | PDXK     | DBP | -0.08 | 0.02 | 4.07E-04 | 7.64E-03 |
| CREB3L4 | DBP | -0.06 | 0.01 | 1.17E-06 | 8.47E-05 | PGP      | DBP | 0.10  | 0.02 | 9.04E-10 | 1.37E-07 |
| CRLF1   | DBP | -0.07 | 0.01 | 3.04E-09 | 4.20E-07 | PLA2G12B | DBP | -0.09 | 0.03 | 1.67E-03 | 2.11E-02 |
| CSK     | DBP | 0.34  | 0.04 | 3.26E-17 | 4.96E-14 | PLEKHA7  | DBP | 0.04  | 0.01 | 2.09E-04 | 4.29E-03 |
| CSNK2B  | DBP | -0.28 | 0.09 | 3.13E-03 | 3.55E-02 | PPCS     | DBP | -0.08 | 0.03 | 2.86E-03 | 3.34E-02 |
| CTSF    | DBP | -0.07 | 0.01 | 4.44E-06 | 2.33E-04 | PRKCA    | DBP | -0.10 | 0.03 | 3.03E-04 | 6.06E-03 |
| CYRIB   | DBP | 0.16  | 0.05 | 2.14E-03 | 2.63E-02 | PRKCSH   | DBP | 0.09  | 0.03 | 4.87E-04 | 8.52E-03 |
| DBNL    | DBP | 0.11  | 0.04 | 3.54E-03 | 3.93E-02 | PROC     | DBP | 0.08  | 0.02 | 9.55E-06 | 4.40E-04 |
| DEF6    | DBP | -0.06 | 0.01 | 3.47E-05 | 1.17E-03 | PRSS27   | DBP | -0.06 | 0.02 | 3.86E-04 | 7.34E-03 |
| DHX58   | DBP | 0.05  | 0.02 | 1.43E-03 | 1.89E-02 | PRSS8    | DBP | 0.21  | 0.05 | 1.35E-05 | 5.70E-04 |
| DLL1    | DBP | -0.13 | 0.02 | 4.24E-08 | 4.30E-06 | PTPN9    | DBP | 0.15  | 0.04 | 1.73E-04 | 3.80E-03 |
| DPP7    | DBP | 0.06  | 0.02 | 4.95E-04 | 8.54E-03 | QDPR     | DBP | 0.02  | 0.01 | 1.90E-03 | 2.34E-02 |
| ECI1    | DBP | -0.07 | 0.02 | 6.71E-05 | 2.00E-03 | QSOX2    | DBP | 0.04  | 0.01 | 7.82E-05 | 2.19E-03 |
| ENPEP   | DBP | -0.04 | 0.01 | 1.39E-03 | 1.85E-02 | RAB1A    | DBP | 0.14  | 0.05 | 2.28E-03 | 2.77E-02 |
| ENPP2   | DBP | -0.06 | 0.02 | 6.56E-04 | 1.04E-02 | RARRES2  | DBP | -0.04 | 0.01 | 4.19E-04 | 7.73E-03 |
| EPHA2   | DBP | -0.24 | 0.06 | 1.23E-04 | 3.10E-03 | SDF2     | DBP | -0.04 | 0.01 | 7.93E-05 | 2.19E-03 |
| EPO     | DBP | 0.14  | 0.04 | 1.26E-04 | 3.10E-03 | SELE     | DBP | -0.09 | 0.02 | 9.65E-05 | 2.53E-03 |
| ESAM    | DBP | -0.07 | 0.02 | 8.40E-05 | 2.28E-03 | SEPTIN11 | DBP | -0.15 | 0.04 | 5.50E-04 | 9.00E-03 |
| FABP2   | DBP | -0.04 | 0.01 | 6.83E-10 | 1.30E-07 | SERPING1 | DBP | -0.02 | 0.01 | 4.50E-03 | 4.71E-02 |

|         |     |       |      |          |          |           |     |       |      |          |          |
|---------|-----|-------|------|----------|----------|-----------|-----|-------|------|----------|----------|
| FAM171B | DBP | 0.06  | 0.02 | 8.39E-04 | 1.28E-02 | SLMAP     | DBP | 0.18  | 0.06 | 3.70E-03 | 4.02E-02 |
| FCN3    | DBP | 0.02  | 0.01 | 2.42E-03 | 2.89E-02 | SPP1      | DBP | 0.17  | 0.04 | 1.85E-04 | 4.02E-03 |
| FGFBP1  | DBP | -0.11 | 0.03 | 8.53E-04 | 1.28E-02 | SRL       | DBP | -0.07 | 0.02 | 1.62E-03 | 2.08E-02 |
| FLRT2   | DBP | 0.03  | 0.01 | 6.06E-04 | 9.69E-03 | STIM1     | DBP | -0.09 | 0.03 | 1.34E-03 | 1.80E-02 |
| G3BP1   | DBP | 0.13  | 0.04 | 2.62E-03 | 3.09E-02 | TCL1A     | DBP | 0.04  | 0.01 | 8.89E-04 | 1.30E-02 |
| GHR     | DBP | 0.06  | 0.01 | 1.08E-06 | 8.21E-05 | TCN2      | DBP | -0.03 | 0.01 | 5.80E-05 | 1.76E-03 |
| GNMT    | DBP | -0.05 | 0.01 | 3.16E-05 | 1.14E-03 | TESC      | DBP | -0.02 | 0.01 | 1.45E-03 | 1.90E-02 |
| GREM1   | DBP | -0.02 | 0.01 | 1.09E-03 | 1.53E-02 | THYN1     | DBP | 0.22  | 0.06 | 1.92E-04 | 4.09E-03 |
| GSTP1   | DBP | 0.07  | 0.02 | 1.67E-04 | 3.72E-03 | TMEM106B  | DBP | -0.08 | 0.02 | 4.22E-04 | 7.73E-03 |
| HABP4   | DBP | 0.04  | 0.01 | 3.10E-06 | 1.81E-04 | TNFAIP3   | DBP | 0.06  | 0.02 | 8.89E-04 | 1.30E-02 |
| HAGH    | DBP | 0.07  | 0.02 | 2.01E-04 | 4.19E-03 | TNFRSF11B | DBP | -0.06 | 0.01 | 1.30E-04 | 3.10E-03 |
| HYAL1   | DBP | 0.07  | 0.02 | 5.45E-04 | 9.00E-03 | TNFRSF17  | DBP | -0.09 | 0.02 | 2.25E-06 | 1.48E-04 |
| ICAM1   | DBP | 0.01  | 0.00 | 1.28E-03 | 1.75E-02 | TRDMT1    | DBP | -0.03 | 0.01 | 9.70E-04 | 1.40E-02 |
| ICAM4   | DBP | 0.12  | 0.02 | 3.62E-07 | 2.90E-05 | TRIL      | DBP | -0.10 | 0.04 | 4.44E-03 | 4.69E-02 |
| IL17B   | DBP | -0.10 | 0.04 | 4.56E-03 | 4.75E-02 | TTL       | DBP | 0.22  | 0.05 | 3.75E-06 | 2.11E-04 |
| IL18R1  | DBP | -0.02 | 0.01 | 1.10E-03 | 1.53E-02 | TYRO3     | DBP | -0.10 | 0.03 | 5.08E-05 | 1.61E-03 |
| INHBB   | DBP | 0.04  | 0.01 | 7.66E-05 | 2.19E-03 | UBE2C     | DBP | 0.05  | 0.02 | 3.96E-03 | 4.21E-02 |
| INPP5B  | DBP | 0.06  | 0.01 | 2.50E-07 | 2.24E-05 | ULK3      | DBP | 0.22  | 0.03 | 3.98E-12 | 1.21E-09 |
| INSR    | DBP | -0.11 | 0.04 | 2.89E-03 | 3.35E-02 | VTN       | DBP | -0.02 | 0.00 | 9.96E-06 | 4.45E-04 |
| ITPKA   | DBP | 0.16  | 0.04 | 1.51E-05 | 6.05E-04 | WARS1     | DBP | 0.05  | 0.01 | 3.28E-05 | 1.15E-03 |
| KLC1    | DBP | 0.18  | 0.03 | 8.55E-10 | 1.37E-07 | WBP2      | DBP | 0.17  | 0.05 | 1.03E-03 | 1.46E-02 |
| LAMC2   | DBP | 0.03  | 0.01 | 7.90E-04 | 1.21E-02 | WFDC5     | DBP | 0.15  | 0.05 | 1.89E-03 | 2.34E-02 |
| LAYN    | DBP | -0.16 | 0.05 | 9.75E-04 | 1.40E-02 | ZFAND1    | DBP | -0.06 | 0.02 | 7.79E-04 | 1.21E-02 |
| LEAP2   | DBP | -0.05 | 0.01 | 2.83E-07 | 2.39E-05 |           |     |       |      |          |          |

**Table S16.** Functional enrichment analysis of causal proteins associated with essential hypertension (MVP).

| Type | Description                                                         | GeneRatio | BgRatio   | RichFactor | FoldEnrichment | zScore | pvalue   | p.adjust |
|------|---------------------------------------------------------------------|-----------|-----------|------------|----------------|--------|----------|----------|
| BP   | alcohol metabolic process                                           | 14/139    | 373/18870 | 0.04       | 5.10           | 6.88   | 6.84E-07 | 1.88E-03 |
| BP   | positive regulation of neuron projection development                | 9/139     | 158/18870 | 0.06       | 7.73           | 7.32   | 2.61E-06 | 3.58E-03 |
| BP   | positive regulation of macrophage derived foam cell differentiation | 4/139     | 19/18870  | 0.21       | 28.58          | 10.36  | 1.00E-05 | 9.17E-03 |
| BP   | fatty acid metabolic process                                        | 12/139    | 401/18870 | 0.03       | 4.06           | 5.34   | 4.23E-05 | 1.54E-02 |
| BP   | negative regulation of viral life cycle                             | 4/139     | 28/18870  | 0.14       | 19.39          | 8.39   | 5.03E-05 | 1.54E-02 |
| BP   | plasma lipoprotein particle clearance                               | 5/139     | 55/18870  | 0.09       | 12.34          | 7.26   | 5.22E-05 | 1.54E-02 |
| BP   | negative regulation of catalytic activity                           | 13/139    | 480/18870 | 0.03       | 3.68           | 5.12   | 5.61E-05 | 1.54E-02 |
| BP   | regulation of plasma lipoprotein particle levels                    | 6/139     | 91/18870  | 0.07       | 8.95           | 6.55   | 5.72E-05 | 1.54E-02 |
| BP   | regulation of endocytosis                                           | 10/139    | 291/18870 | 0.03       | 4.67           | 5.43   | 6.03E-05 | 1.54E-02 |
| BP   | regulation of lipid localization                                    | 8/139     | 183/18870 | 0.04       | 5.93           | 5.78   | 6.41E-05 | 1.54E-02 |
| BP   | positive regulation of cell projection organization                 | 11/139    | 355/18870 | 0.03       | 4.21           | 5.25   | 6.54E-05 | 1.54E-02 |
| BP   | response to metal ion                                               | 11/139    | 359/18870 | 0.03       | 4.16           | 5.21   | 7.23E-05 | 1.54E-02 |
| BP   | very-low-density lipoprotein particle assembly                      | 3/139     | 12/18870  | 0.25       | 33.94          | 9.83   | 8.20E-05 | 1.54E-02 |
| BP   | regulation of macrophage derived foam cell differentiation          | 4/139     | 33/18870  | 0.12       | 16.46          | 7.65   | 9.77E-05 | 1.54E-02 |
| BP   | protein-lipid complex remodeling                                    | 4/139     | 33/18870  | 0.12       | 16.46          | 7.65   | 9.77E-05 | 1.54E-02 |
| BP   | plasma lipoprotein particle remodeling                              | 4/139     | 33/18870  | 0.12       | 16.46          | 7.65   | 9.77E-05 | 1.54E-02 |
| BP   | organic hydroxy compound biosynthetic process                       | 9/139     | 251/18870 | 0.04       | 4.87           | 5.31   | 1.03E-04 | 1.54E-02 |
| BP   | negative regulation of fibrinolysis                                 | 3/139     | 13/18870  | 0.23       | 31.33          | 9.42   | 1.06E-04 | 1.54E-02 |
| BP   | small molecule catabolic process                                    | 11/139    | 375/18870 | 0.03       | 3.98           | 5.02   | 1.06E-04 | 1.54E-02 |
| BP   | protein-containing complex remodeling                               | 4/139     | 35/18870  | 0.11       | 15.51          | 7.40   | 1.24E-04 | 1.70E-02 |
| BP   | lipid transport                                                     | 12/139    | 453/18870 | 0.03       | 3.60           | 4.82   | 1.35E-04 | 1.73E-02 |
| BP   | biological process involved in symbiotic interaction                | 10/139    | 322/18870 | 0.03       | 4.22           | 5.01   | 1.39E-04 | 1.73E-02 |
| BP   | positive regulation of dendrite development                         | 3/139     | 16/18870  | 0.19       | 25.45          | 8.43   | 2.04E-04 | 2.35E-02 |

|    |                                                                                        |        |           |      |       |      |          |          |
|----|----------------------------------------------------------------------------------------|--------|-----------|------|-------|------|----------|----------|
| BP | macrophage derived foam cell differentiation                                           | 4/139  | 40/18870  | 0.10 | 13.58 | 6.86 | 2.10E-04 | 2.35E-02 |
| BP | negative regulation of hydrolase activity                                              | 8/139  | 218/18870 | 0.04 | 4.98  | 5.09 | 2.15E-04 | 2.35E-02 |
| BP | foam cell differentiation                                                              | 4/139  | 41/18870  | 0.10 | 13.24 | 6.76 | 2.31E-04 | 2.35E-02 |
| BP | transmembrane receptor protein serine/threonine kinase signaling pathway               | 11/139 | 410/18870 | 0.03 | 3.64  | 4.66 | 2.31E-04 | 2.35E-02 |
| BP | regulation of transforming growth factor beta production                               | 4/139  | 42/18870  | 0.10 | 12.93 | 6.67 | 2.54E-04 | 2.46E-02 |
| BP | positive regulation of response to wounding                                            | 5/139  | 77/18870  | 0.06 | 8.82  | 5.92 | 2.61E-04 | 2.46E-02 |
| BP | cellular ketone metabolic process                                                      | 8/139  | 226/18870 | 0.04 | 4.81  | 4.96 | 2.74E-04 | 2.51E-02 |
| BP | regulation of fibrinolysis                                                             | 3/139  | 18/18870  | 0.17 | 22.63 | 7.91 | 2.94E-04 | 2.61E-02 |
| BP | transforming growth factor beta production                                             | 4/139  | 45/18870  | 0.09 | 12.07 | 6.40 | 3.32E-04 | 2.61E-02 |
| BP | regulation of leukocyte chemotaxis                                                     | 6/139  | 126/18870 | 0.05 | 6.46  | 5.30 | 3.42E-04 | 2.61E-02 |
| BP | reactive oxygen species metabolic process                                              | 8/139  | 234/18870 | 0.03 | 4.64  | 4.83 | 3.47E-04 | 2.61E-02 |
| BP | positive regulation of macrophage chemotaxis                                           | 3/139  | 19/18870  | 0.16 | 21.44 | 7.68 | 3.48E-04 | 2.61E-02 |
| BP | neural crest cell development                                                          | 5/139  | 82/18870  | 0.06 | 8.28  | 5.69 | 3.49E-04 | 2.61E-02 |
| BP | regulation of transmembrane receptor protein serine/threonine kinase signaling pathway | 9/139  | 297/18870 | 0.03 | 4.11  | 4.66 | 3.61E-04 | 2.61E-02 |
| BP | extracellular matrix assembly                                                          | 4/139  | 46/18870  | 0.09 | 11.80 | 6.32 | 3.62E-04 | 2.61E-02 |
| BP | phagocytosis                                                                           | 8/139  | 237/18870 | 0.03 | 4.58  | 4.78 | 3.77E-04 | 2.66E-02 |
| BP | acute-phase response                                                                   | 4/139  | 48/18870  | 0.08 | 11.31 | 6.16 | 4.27E-04 | 2.79E-02 |
| BP | negative regulation of blood coagulation                                               | 4/139  | 48/18870  | 0.08 | 11.31 | 6.16 | 4.27E-04 | 2.79E-02 |
| BP | apoptotic cell clearance                                                               | 4/139  | 48/18870  | 0.08 | 11.31 | 6.16 | 4.27E-04 | 2.79E-02 |
| BP | negative regulation of hemostasis                                                      | 4/139  | 49/18870  | 0.08 | 11.08 | 6.09 | 4.62E-04 | 2.80E-02 |
| BP | ethanol metabolic process                                                              | 3/139  | 21/18870  | 0.14 | 19.39 | 7.26 | 4.72E-04 | 2.80E-02 |
| BP | negative regulation of lipoprotein particle clearance                                  | 3/139  | 21/18870  | 0.14 | 19.39 | 7.26 | 4.72E-04 | 2.80E-02 |
| BP | regulation of extracellular matrix assembly                                            | 3/139  | 21/18870  | 0.14 | 19.39 | 7.26 | 4.72E-04 | 2.80E-02 |
| BP | stem cell development                                                                  | 5/139  | 88/18870  | 0.06 | 7.71  | 5.44 | 4.84E-04 | 2.80E-02 |

|    |                                                                     |        |           |      |       |      |          |          |
|----|---------------------------------------------------------------------|--------|-----------|------|-------|------|----------|----------|
| BP | movement in host                                                    | 7/139  | 188/18870 | 0.04 | 5.05  | 4.81 | 4.92E-04 | 2.80E-02 |
| BP | plasma lipoprotein particle organization                            | 4/139  | 50/18870  | 0.08 | 10.86 | 6.01 | 4.99E-04 | 2.80E-02 |
| BP | regulation of neuron projection development                         | 11/139 | 453/18870 | 0.02 | 3.30  | 4.26 | 5.37E-04 | 2.87E-02 |
| BP | kidney development                                                  | 9/139  | 314/18870 | 0.03 | 3.89  | 4.45 | 5.40E-04 | 2.87E-02 |
| BP | regulation of renal system process                                  | 3/139  | 22/18870  | 0.14 | 18.51 | 7.08 | 5.44E-04 | 2.87E-02 |
| BP | negative regulation of coagulation                                  | 4/139  | 52/18870  | 0.08 | 10.44 | 5.87 | 5.80E-04 | 2.89E-02 |
| BP | cholesterol metabolic process                                       | 6/139  | 140/18870 | 0.04 | 5.82  | 4.93 | 6.00E-04 | 2.89E-02 |
| BP | negative regulation of viral entry into host cell                   | 3/139  | 23/18870  | 0.13 | 17.71 | 6.91 | 6.22E-04 | 2.89E-02 |
| BP | positive regulation of transforming growth factor beta production   | 3/139  | 23/18870  | 0.13 | 17.71 | 6.91 | 6.22E-04 | 2.89E-02 |
| BP | negative regulation of viral process                                | 5/139  | 93/18870  | 0.05 | 7.30  | 5.25 | 6.24E-04 | 2.89E-02 |
| BP | alpha-amino acid catabolic process                                  | 5/139  | 93/18870  | 0.05 | 7.30  | 5.25 | 6.24E-04 | 2.89E-02 |
| BP | protein-lipid complex subunit organization                          | 4/139  | 53/18870  | 0.08 | 10.25 | 5.81 | 6.24E-04 | 2.89E-02 |
| BP | viral life cycle                                                    | 9/139  | 321/18870 | 0.03 | 3.81  | 4.37 | 6.32E-04 | 2.89E-02 |
| BP | humoral immune response                                             | 8/139  | 258/18870 | 0.03 | 4.21  | 4.47 | 6.61E-04 | 2.94E-02 |
| BP | renal system development                                            | 9/139  | 324/18870 | 0.03 | 3.77  | 4.33 | 6.75E-04 | 2.94E-02 |
| BP | regulation of systemic arterial blood pressure                      | 5/139  | 95/18870  | 0.05 | 7.15  | 5.17 | 6.87E-04 | 2.94E-02 |
| BP | neural crest cell differentiation                                   | 5/139  | 95/18870  | 0.05 | 7.15  | 5.17 | 6.87E-04 | 2.94E-02 |
| BP | response to calcium ion                                             | 6/139  | 144/18870 | 0.04 | 5.66  | 4.83 | 6.95E-04 | 2.94E-02 |
| BP | regulation of systemic arterial blood pressure by renin-angiotensin | 3/139  | 24/18870  | 0.13 | 16.97 | 6.74 | 7.07E-04 | 2.94E-02 |
| BP | positive regulation of leukocyte chemotaxis                         | 5/139  | 96/18870  | 0.05 | 7.07  | 5.14 | 7.21E-04 | 2.95E-02 |
| BP | ureteric bud development                                            | 5/139  | 98/18870  | 0.05 | 6.93  | 5.07 | 7.92E-04 | 3.19E-02 |
| BP | mesonephric epithelium development                                  | 5/139  | 99/18870  | 0.05 | 6.86  | 5.03 | 8.29E-04 | 3.24E-02 |
| BP | mesonephric tubule development                                      | 5/139  | 99/18870  | 0.05 | 6.86  | 5.03 | 8.29E-04 | 3.24E-02 |
| BP | lipid catabolic process                                             | 9/139  | 334/18870 | 0.03 | 3.66  | 4.22 | 8.37E-04 | 3.24E-02 |
| BP | secondary alcohol metabolic process                                 | 6/139  | 150/18870 | 0.04 | 5.43  | 4.69 | 8.61E-04 | 3.26E-02 |

|      |                                                        |       |           |      |       |      |          |          |
|------|--------------------------------------------------------|-------|-----------|------|-------|------|----------|----------|
| BP   | regulation of phagocytosis                             | 5/139 | 100/18870 | 0.05 | 6.79  | 5.00 | 8.67E-04 | 3.26E-02 |
| BP   | negative regulation of fatty acid biosynthetic process | 3/139 | 26/18870  | 0.12 | 15.66 | 6.45 | 8.98E-04 | 3.29E-02 |
| BP   | positive regulation of macrophage migration            | 3/139 | 26/18870  | 0.12 | 15.66 | 6.45 | 8.98E-04 | 3.29E-02 |
| BP   | neural crest cell migration                            | 4/139 | 59/18870  | 0.07 | 9.20  | 5.44 | 9.37E-04 | 3.31E-02 |
| BP   | regulation of lipid transport                          | 6/139 | 153/18870 | 0.04 | 5.32  | 4.63 | 9.54E-04 | 3.31E-02 |
| BP   | biological process involved in interaction with host   | 7/139 | 211/18870 | 0.03 | 4.50  | 4.41 | 9.72E-04 | 3.31E-02 |
| BP   | sterol metabolic process                               | 6/139 | 154/18870 | 0.04 | 5.29  | 4.60 | 9.87E-04 | 3.31E-02 |
| BP   | mesonephros development                                | 5/139 | 103/18870 | 0.05 | 6.59  | 4.90 | 9.91E-04 | 3.31E-02 |
| KEGG | Biosynthesis of cofactors                              | 8/89  | 154/9521  | 0.05 | 5.56  | 5.54 | 9.10E-05 | 2.16E-02 |
| KEGG | Glyoxylate and dicarboxylate metabolism                | 4/89  | 32/9521   | 0.13 | 13.37 | 6.81 | 2.10E-04 | 2.49E-02 |
| KEGG | Fatty acid degradation                                 | 4/89  | 43/9521   | 0.09 | 9.95  | 5.71 | 6.67E-04 | 4.23E-02 |
| KEGG | Carbon metabolism                                      | 6/89  | 117/9521  | 0.05 | 5.49  | 4.74 | 7.68E-04 | 4.23E-02 |
| KEGG | Pyruvate metabolism                                    | 4/89  | 47/9521   | 0.09 | 9.10  | 5.41 | 9.36E-04 | 4.23E-02 |

---

**Table S17.** Functional enrichment analysis of causal proteins associated with diastolic blood pressure (MVP).

| Type | Description                                              | GeneRatio | BgRatio   | RichFactor | FoldEnrichment | zScore | pvalue   | p.adjust |
|------|----------------------------------------------------------|-----------|-----------|------------|----------------|--------|----------|----------|
| BP   | regulation of bone remodeling                            | 6/140     | 49/18870  | 0.12       | 16.50          | 9.40   | 1.61E-06 | 2.35E-03 |
| BP   | adhesion of symbiont to host                             | 4/140     | 13/18870  | 0.31       | 41.47          | 12.62  | 1.97E-06 | 2.35E-03 |
| BP   | positive regulation of receptor-mediated endocytosis     | 6/140     | 53/18870  | 0.11       | 15.26          | 8.99   | 2.58E-06 | 2.35E-03 |
| BP   | bone remodeling                                          | 7/140     | 89/18870  | 0.08       | 10.60          | 7.85   | 4.42E-06 | 3.02E-03 |
| BP   | negative regulation of bone remodeling                   | 4/140     | 18/18870  | 0.22       | 29.95          | 10.62  | 8.19E-06 | 4.48E-03 |
| BP   | response to interleukin-1                                | 8/140     | 140/18870 | 0.06       | 7.70           | 6.88   | 9.84E-06 | 4.49E-03 |
| BP   | regulation of bone resorption                            | 5/140     | 42/18870  | 0.12       | 16.05          | 8.44   | 1.43E-05 | 5.38E-03 |
| BP   | negative regulation of tissue remodeling                 | 4/140     | 21/18870  | 0.19       | 25.67          | 9.78   | 1.57E-05 | 5.38E-03 |
| BP   | positive regulation of endocytosis                       | 8/140     | 155/18870 | 0.05       | 6.96           | 6.44   | 2.07E-05 | 5.95E-03 |
| BP   | receptor-mediated endocytosis                            | 10/140    | 258/18870 | 0.04       | 5.22           | 5.91   | 2.32E-05 | 5.95E-03 |
| BP   | regulation of receptor-mediated endocytosis              | 7/140     | 115/18870 | 0.06       | 8.20           | 6.70   | 2.39E-05 | 5.95E-03 |
| BP   | positive regulation of peptidyl-tyrosine phosphorylation | 8/140     | 168/18870 | 0.05       | 6.42           | 6.10   | 3.68E-05 | 7.89E-03 |
| BP   | regulation of tissue remodeling                          | 6/140     | 85/18870  | 0.07       | 9.51           | 6.80   | 4.05E-05 | 7.89E-03 |
| BP   | tissue homeostasis                                       | 10/140    | 279/18870 | 0.04       | 4.83           | 5.57   | 4.51E-05 | 7.89E-03 |
| BP   | anatomical structure homeostasis                         | 10/140    | 279/18870 | 0.04       | 4.83           | 5.57   | 4.51E-05 | 7.89E-03 |
| BP   | adhesion of symbiont to host cell                        | 3/140     | 10/18870  | 0.30       | 40.44          | 10.78  | 4.62E-05 | 7.89E-03 |
| BP   | cell adhesion mediated by integrin                       | 6/140     | 88/18870  | 0.07       | 9.19           | 6.66   | 4.93E-05 | 7.92E-03 |
| BP   | positive regulation of transferase activity              | 12/140    | 414/18870 | 0.03       | 3.91           | 5.17   | 6.17E-05 | 8.35E-03 |
| BP   | negative regulation of response to external stimulus     | 13/140    | 481/18870 | 0.03       | 3.64           | 5.08   | 6.18E-05 | 8.35E-03 |
| BP   | complement activation, lectin pathway                    | 3/140     | 11/18870  | 0.27       | 36.76          | 10.26  | 6.31E-05 | 8.35E-03 |
| BP   | regulation of endocytosis                                | 10/140    | 291/18870 | 0.03       | 4.63           | 5.40   | 6.41E-05 | 8.35E-03 |
| BP   | tissue remodeling                                        | 8/140     | 184/18870 | 0.04       | 5.86           | 5.73   | 7.01E-05 | 8.71E-03 |
| BP   | bone resorption                                          | 5/140     | 65/18870  | 0.08       | 10.37          | 6.54   | 1.21E-04 | 1.44E-02 |
| BP   | negative regulation of response to biotic stimulus       | 7/140     | 150/18870 | 0.05       | 6.29           | 5.62   | 1.30E-04 | 1.45E-02 |

|      |                                                                     |        |           |      |       |      |          |          |
|------|---------------------------------------------------------------------|--------|-----------|------|-------|------|----------|----------|
| BP   | humoral immune response                                             | 9/140  | 258/18870 | 0.03 | 4.70  | 5.18 | 1.34E-04 | 1.45E-02 |
| BP   | response to tumor necrosis factor                                   | 9/140  | 259/18870 | 0.03 | 4.68  | 5.16 | 1.38E-04 | 1.45E-02 |
| BP   | response to ketone                                                  | 8/140  | 208/18870 | 0.04 | 5.18  | 5.25 | 1.64E-04 | 1.66E-02 |
| BP   | biological process involved in interaction with host                | 8/140  | 211/18870 | 0.04 | 5.11  | 5.19 | 1.81E-04 | 1.77E-02 |
| BP   | negative regulation of bone resorption                              | 3/140  | 16/18870  | 0.19 | 25.27 | 8.40 | 2.09E-04 | 1.94E-02 |
| BP   | positive regulation of kinase activity                              | 10/140 | 337/18870 | 0.03 | 4.00  | 4.80 | 2.13E-04 | 1.94E-02 |
| BP   | peptidyl-tyrosine phosphorylation                                   | 9/140  | 276/18870 | 0.03 | 4.40  | 4.91 | 2.22E-04 | 1.96E-02 |
| BP   | peptidyl-tyrosine modification                                      | 9/140  | 278/18870 | 0.03 | 4.36  | 4.88 | 2.34E-04 | 2.00E-02 |
| BP   | purine-containing compound metabolic process                        | 12/140 | 493/18870 | 0.02 | 3.28  | 4.44 | 3.13E-04 | 2.59E-02 |
| BP   | regulation of peptidyl-tyrosine phosphorylation                     | 8/140  | 231/18870 | 0.03 | 4.67  | 4.85 | 3.34E-04 | 2.67E-02 |
| BP   | response to testosterone                                            | 4/140  | 45/18870  | 0.09 | 11.98 | 6.38 | 3.42E-04 | 2.67E-02 |
| BP   | positive regulation of macrophage derived foam cell differentiation | 3/140  | 19/18870  | 0.16 | 21.28 | 7.65 | 3.55E-04 | 2.70E-02 |
| BP   | cellular response to tumor necrosis factor                          | 8/140  | 238/18870 | 0.03 | 4.53  | 4.74 | 4.07E-04 | 3.01E-02 |
| BP   | purine ribonucleoside metabolic process                             | 3/140  | 21/18870  | 0.14 | 19.26 | 7.24 | 4.82E-04 | 3.47E-02 |
| BP   | negative regulation of innate immune response                       | 5/140  | 91/18870  | 0.05 | 7.41  | 5.30 | 5.83E-04 | 4.09E-02 |
| BP   | viral life cycle                                                    | 9/140  | 321/18870 | 0.03 | 3.78  | 4.34 | 6.65E-04 | 4.13E-02 |
| BP   | extracellular matrix organization                                   | 9/140  | 321/18870 | 0.03 | 3.78  | 4.34 | 6.65E-04 | 4.13E-02 |
| BP   | negative regulation of defense response                             | 9/140  | 321/18870 | 0.03 | 3.78  | 4.34 | 6.65E-04 | 4.13E-02 |
| BP   | extracellular structure organization                                | 9/140  | 322/18870 | 0.03 | 3.77  | 4.33 | 6.80E-04 | 4.13E-02 |
| BP   | biological process involved in symbiotic interaction                | 9/140  | 322/18870 | 0.03 | 3.77  | 4.33 | 6.80E-04 | 4.13E-02 |
| BP   | purine nucleotide metabolic process                                 | 11/140 | 463/18870 | 0.02 | 3.20  | 4.15 | 6.83E-04 | 4.13E-02 |
| BP   | external encapsulating structure organization                       | 9/140  | 323/18870 | 0.03 | 3.76  | 4.32 | 6.96E-04 | 4.13E-02 |
| KEGG | NF-kappa B signaling pathway                                        | 6/90   | 105/9521  | 0.06 | 6.05  | 5.08 | 4.59E-04 | 3.93E-02 |
| KEGG | PI3K-Akt signaling pathway                                          | 11/90  | 362/9521  | 0.03 | 3.21  | 4.20 | 5.79E-04 | 3.93E-02 |
| KEGG | Biosynthesis of cofactors                                           | 7/90   | 154/9521  | 0.05 | 4.81  | 4.65 | 6.14E-04 | 3.93E-02 |
| KEGG | Fatty acid degradation                                              | 4/90   | 43/9521   | 0.09 | 9.84  | 5.68 | 6.95E-04 | 3.93E-02 |

|      |                                     |      |         |      |      |      |          |          |
|------|-------------------------------------|------|---------|------|------|------|----------|----------|
| KEGG | Pyruvate metabolism                 | 4/90 | 47/9521 | 0.09 | 9.00 | 5.37 | 9.76E-04 | 4.41E-02 |
| KEGG | Complement and coagulation cascades | 5/90 | 88/9521 | 0.06 | 6.01 | 4.61 | 1.43E-03 | 4.84E-02 |
| KEGG | ECM-receptor interaction            | 5/90 | 89/9521 | 0.06 | 5.94 | 4.58 | 1.50E-03 | 4.84E-02 |

---

**Table S18.** Bayesian colocalization analysis for candidate proteins to blood pressure traits (MVP).

| Exposure | Outcome | nSNP  | PP.H0.abf | PP.H1.abf | PP.H2.abf | PP.H3.abf | PP.H4.abf |
|----------|---------|-------|-----------|-----------|-----------|-----------|-----------|
| NQO1     | HTN     | 7965  | 0.00%     | 0.02%     | 0.00%     | 99.97%    | 0.00%     |
| CCN3     | DBP     | 9238  | 0.00%     | 0.00%     | 0.00%     | 38.24%    | 61.76%    |
| COL6A3   | DBP     | 10530 | 0.00%     | 4.43%     | 0.00%     | 26.03%    | 69.53%    |
| NPPB     | DBP     | 8666  | 0.00%     | 0.00%     | 0.00%     | 100.00%   | 0.00%     |

**Table S19.** Mediation effect of blood pressure traits (MVP) on protein-associated aortic dissection.

| Exposure | Mediator | Outcome | Beta (95% CI)        | Proportion (95% CI)     | P value  |
|----------|----------|---------|----------------------|-------------------------|----------|
| NQO1     | HTN      | AD      | -0.04 (-0.06, -0.02) | 12.04% (5.43%, 18.65%)  | 3.58E-04 |
| CCN3     | DBP      | AD      | -0.35 (-0.48, -0.21) | 23.11% (13.96%, 32.27%) | 7.54E-07 |
| COL6A3   | DBP      | AD      | -0.21 (-0.33, -0.1)  | 10.22% (4.66%, 15.77%)  | 3.12E-04 |
| NPPB     | DBP      | AD      | -0.08 (-0.13, -0.03) | 26.24% (9.65%, 42.83%)  | 1.93E-03 |

**Table S20.** Causal association between tissue-specific gene expression and aortic dissection.

| Exposure | Outcome | Method     | nSNP | Beta  | SE   | P value  | Cohort  | Tissue |
|----------|---------|------------|------|-------|------|----------|---------|--------|
| CCN3     | AD      | Wald ratio | 1    | -0.40 | 0.19 | 3.56E-02 | eQTLGen | Blood  |
| COL6A3   | AD      | Wald ratio | 1    | 0.02  | 0.16 | 8.89E-01 | eQTLGen | Blood  |
| NQO1     | AD      | Wald ratio | 1    | -0.20 | 0.12 | 9.36E-02 | eQTLGen | Blood  |
| CCN3     | AD      | Wald ratio | 1    | -0.71 | 0.28 | 1.13E-02 | GTEEx   | Aorta  |
| COL6A3   | AD      | Wald ratio | 1    | -0.56 | 0.22 | 1.07E-02 | GTEEx   | Aorta  |

**Table S21.** Potential drugs for candidate proteins in Therapeutic Target Database (TTD).

| Gene   | Target Type                | Disease                            | Drugs               | Drug Status                                       | Mode of Action |
|--------|----------------------------|------------------------------------|---------------------|---------------------------------------------------|----------------|
| CCN3   | /                          | /                                  | /                   | /                                                 | /              |
| COL6A3 | Literature-reported target | /                                  | /                   | /                                                 | /              |
| NPPB   | Literature-reported target | Hypertension                       | BD-NP               | Investigative                                     | Modulator      |
|        |                            | Choreiform disorder;               | ARQ 761             | Clinical Trial Drug (Phase 2, Pancreatic cancer)  | Inhibitor      |
|        |                            | CNS anomalies syndrome;            |                     |                                                   |                |
| NQO1   | Clinical trial target      | Inborn energy metabolism error;    | BioE-743            | Clinical Trial Drug (Phase 2, Leigh syndrome)     | Modulator      |
|        |                            | Intellectual development disorder; |                     |                                                   |                |
|        |                            | Pancreatic cancer;                 | Coenzyme Q10 analog | Clinical Trial Drug (Phase 2, Huntington disease) | Modulator      |
|        |                            | Solid tumour/cancer                |                     |                                                   |                |

**Table S22.** Potential drugs for candidate proteins in Drug-Gene Interaction Database (DGIdb).

| Gene   | Drug                                 | Regulatory approval | Indication                                                            | Interaction type | Direct interaction | Mechanism of action        | Interaction score |
|--------|--------------------------------------|---------------------|-----------------------------------------------------------------------|------------------|--------------------|----------------------------|-------------------|
| CCN3   | /                                    | /                   | /                                                                     | /                | /                  | /                          | /                 |
|        | OCRIPLASMIN                          | Approved            |                                                                       | cleavage         | TRUE               | Collagen hydrolytic enzyme | 0.34              |
| COL6A3 | ESI-09                               | Not Approved        |                                                                       | inhibitor        | FALSE              | Inhibition                 | 6.53              |
|        | COLLAGENASE CLOSTRIDIUM HISTOLYTICUM | Approved            | for treatment of Dupuytren's contracture                              | cleavage         | TRUE               | Collagen hydrolytic enzyme | 0.47              |
|        | HJC 0350                             | Not Approved        |                                                                       | inhibitor        | FALSE              | Inhibition                 | 13.05             |
| NPPB   | /                                    | /                   | /                                                                     | /                | /                  | /                          | /                 |
|        | ORAL CONTRACEPTIVE                   | Not Approved        |                                                                       |                  |                    |                            | 0.37              |
|        | VITAMIN K3                           | Approved            | for reducing EGFR-inhibitor-induced dermatological side effects       |                  |                    |                            | 0.07              |
|        | VATIQUINONE                          | Not Approved        | for treatment of ulcerative colitis, for treatment of Chron's disease |                  |                    |                            | 2.01              |
|        | HYDROQUINONE                         | Approved            |                                                                       |                  |                    |                            | 0.24              |
|        | DICUMAROL                            | Approved            | Anticoagulants                                                        |                  |                    |                            | 0.75              |
| NQO1   | CYTARABINE                           | Approved            | antineoplastic agent                                                  |                  |                    |                            | 0.05              |
|        | ACETAMINOPHEN                        | Approved            | analgesic                                                             |                  |                    |                            | 0.08              |
|        | SULFORAPHANE                         | Not Approved        |                                                                       |                  |                    |                            | 0.57              |
|        | RECOMBINANT 70-KD HEAT-SHOCK PROTEIN | Not Approved        |                                                                       |                  |                    |                            | 0.40              |
|        | DOXORUBICIN HYDROCHLORIDE            | Approved            | antineoplastic agent                                                  |                  |                    |                            | 0.09              |
|        | CHEMBL:CHEMBL1983317                 | Not Approved        |                                                                       |                  |                    |                            | 2.01              |
|        | ETOPOSIDE                            | Approved            | Antineoplastic Agents                                                 |                  |                    |                            | 0.07              |

|                           |              |                                    |           |      |                                   |  |      |
|---------------------------|--------------|------------------------------------|-----------|------|-----------------------------------|--|------|
| CHEMBL:CHEMBL476968       | Not Approved |                                    |           |      |                                   |  | 2.01 |
| METHOTREXATE              | Approved     | DMARD                              |           |      |                                   |  | 0.04 |
| TYROSINE KINASE INHIBITOR | Not Approved |                                    |           |      |                                   |  | 0.15 |
| ITRACONAZOLE              | Approved     |                                    |           |      |                                   |  | 0.45 |
| CHEMBL:CHEMBL1288281      | Not Approved |                                    |           |      |                                   |  | 2.01 |
| BETA-LAPACHONE PRODRUG    | Not Approved |                                    |           |      |                                   |  | 2.01 |
| ARQ 761                   |              |                                    |           |      |                                   |  |      |
| BENZENE                   | Not Approved |                                    |           |      |                                   |  | 6.02 |
| ETHACRYNIC ACID           | Approved     | Antihypertensive Agents; Diuretics |           |      |                                   |  | 0.25 |
| CHEMBL:CHEMBL1287866      | Not Approved |                                    |           |      |                                   |  | 2.01 |
| IDARUBICIN                | Approved     | Antineoplastic Agents              |           |      |                                   |  | 0.08 |
| CHEMBL:CHEMBL1287895      | Not Approved |                                    |           |      |                                   |  | 2.01 |
| CHEMBL:CHEMBL1288253      | Not Approved |                                    |           |      |                                   |  | 2.01 |
| VATIQUINONE               | Not Approved |                                    | modulator | TRUE | Quinone reductase<br>1) modulator |  | 2.01 |
| CHEMBL:CHEMBL1287867      | Not Approved |                                    |           |      |                                   |  | 2.01 |

---

**Table S23.** Potential drugs for candidate proteins in DrugBank.

| Gene   | Drug                                                                              | Drug group                               | Pharmacological action | Type   | Actions       |
|--------|-----------------------------------------------------------------------------------|------------------------------------------|------------------------|--------|---------------|
| CCN3   | Insulin human                                                                     | approved, investigational                | unknown                | target | downregulator |
| COL6A3 | /                                                                                 | /                                        | /                      | /      | /             |
| NPPB   | Carvedilol                                                                        | approved, investigational                | unknown                | target | other         |
|        | 3-(HYDROXYMETHYL)-1-METHYL-5-(2-METHYLAZIRIDIN-1-YL)-2-PHENYL-1H-INDOLE-4,7-DIONE | experimental                             | unknown                | target |               |
|        | 3-Hydroxymethyl-5-Aziridinyl-1methyl-2-[1h-Indole-4,7-Dione]-Propanol             | experimental                             | unknown                | target |               |
|        | 5-Methoxy-1,2-Dimethyl-3-(Phenoxymethyl)Indole-4,7-Dione                          | experimental                             | unknown                | target |               |
|        | alpha-Tocopherol succinate                                                        | approved, nutraceutical,<br>vet_approved | unknown                | enzyme | inducer       |
|        | Bishydroxy[2h-1-Benzopyran-2-One,1,2-Benzopyrone]                                 | experimental                             | yes                    | target | inhibitor     |
|        | Cannabidiol                                                                       | approved, investigational                | unknown                | target | inhibitor     |
|        | Carboplatin                                                                       | approved, investigational                | unknown                | enzyme | substrate     |
|        | Cibacron Blue                                                                     | experimental                             | unknown                | target |               |
| NQO1   | Cisplatin                                                                         | approved, investigational                | unknown                | enzyme | substrate     |
|        | D-alpha-Tocopherol acetate                                                        | approved, nutraceutical,<br>vet_approved | unknown                | enzyme | inducer       |
|        | Dicoumarol                                                                        | approved                                 | unknown                | target | inhibitor     |
|        | Doxorubicin                                                                       | approved, investigational                | no                     | enzyme | substrate     |
|        | Duroquinone                                                                       | experimental                             | yes                    | target | inhibitor     |
|        | ES-936                                                                            | experimental                             | yes                    | target | inhibitor     |
|        | Flavin adenine dinucleotide                                                       | approved                                 | yes                    | target | inhibitor     |
|        | Menadione                                                                         | approved, nutraceutical                  | unknown                | target |               |
|        | Oxaliplatin                                                                       | approved, investigational                | no                     | enzyme | substrate     |
|        | Phenytoin                                                                         | approved, investigational,               | no                     | enzyme | substrate     |

|           |                                                           |         |        |         |
|-----------|-----------------------------------------------------------|---------|--------|---------|
| RH-1      | vet_approved                                              |         |        |         |
|           | investigational                                           | unknown | target |         |
| Vitamin E | approved, investigational,<br>nutraceutical, vet_approved | unknown | enzyme | inducer |

---

**Table S24.** Potential drugs for candidate proteins in Open Targets Platform.

| Gene   | Drug name                               | Type           | Mechanism of action            | Action type       | Disease name                                                                                                           |
|--------|-----------------------------------------|----------------|--------------------------------|-------------------|------------------------------------------------------------------------------------------------------------------------|
| CCN3   | /                                       | /              | /                              | /                 | /                                                                                                                      |
|        | COLLAGENASE CLOSTRIDIUM<br>HISTOLYTICUM | Enzyme         | Collagen hydrolytic enzyme     | Hydrolytic enzyme | Abnormality of connective tissue;<br>contracture;<br>decubitus ulcer;<br>diabetic foot;<br>Dupuytren Contracture; etc. |
| COL6A3 |                                         |                |                                |                   | Abnormal retinal morphology;<br>deep vein thrombosis;                                                                  |
|        | OCRIPLASMIN                             | Protein        | Collagen hydrolytic enzyme     | Hydrolytic enzyme | diabetic macular edema;<br>eye disease;<br>macular degeneration; etc.                                                  |
| NPPB   | /                                       | /              | /                              | /                 | /                                                                                                                      |
|        |                                         |                |                                |                   | autism spectrum disorder;<br>Friedreich ataxia;                                                                        |
| NQO1   | VATIQUINONE                             | Small molecule | Quinone reductase 1) modulator | Modulator         | Leigh syndrome;<br>mitochondrial disease;<br>myopathy; etc.                                                            |

# Supplementary Figures

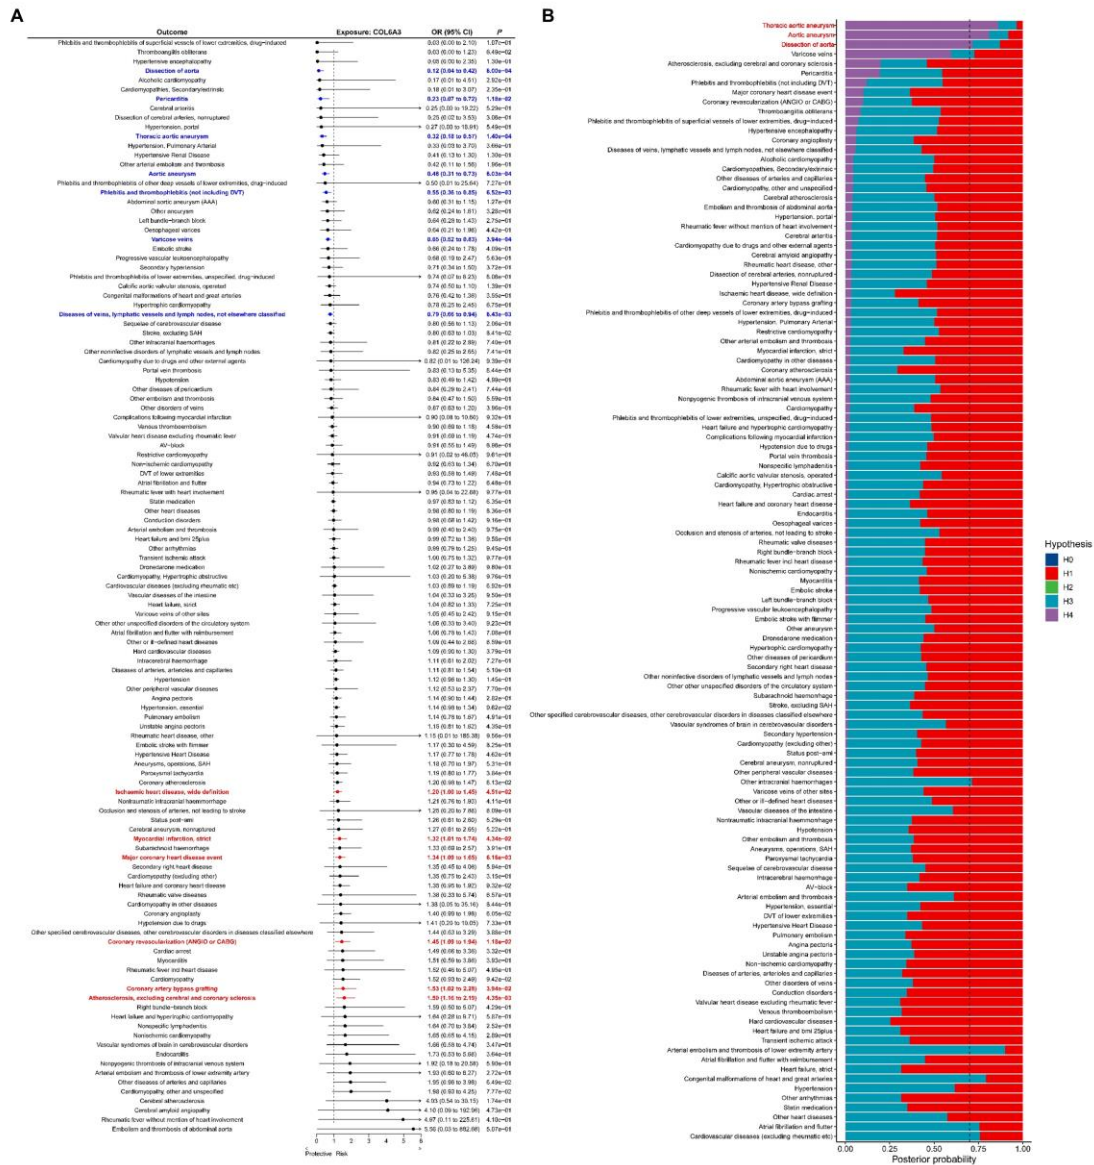

**Figure S1.** Causal association and colocalization analysis between COL6A3 and CVDs. **(A)** Causal estimates between COL6A3 and CVDs. The blue text represents significant protective factors, and the red text represents significant risk factors. **(B)** Colocalization analysis between COL6A3 and CVDs. The black dashed line represents the positive threshold (70%) for the posterior probability of hypothesis 4 (PPH4). Abbreviation: CVD, cardiovascular disease.
